# 1 Digital twinning of Cellular Capsule 2 Technology: emerging outcomes 3 from the perspective of porous 4 media mechanics

5 **Stéphane Urcun**<sup>1,2,3</sup>, **Pierre-Yves Rohan**<sup>1</sup>, **Wafa Skalli**<sup>1</sup>, **Pierre Nassoy**<sup>4</sup>, **Stéphane**  
6 **P.A. Bordas**<sup>2\*</sup>, **Giuseppe Sciumè**<sup>3\*</sup>

**\*For correspondence:**

[stephane.bordas@alum.northwestern.edu](mailto:stephane.bordas@alum.northwestern.edu) (SPAB);  
[giuseppe.sciume@u-bordeaux.fr](mailto:giuseppe.sciume@u-bordeaux.fr) (GS)

7 <sup>1</sup>Institut de Biomécanique Humaine Georges Charpak, Arts et Métiers ParisTech, 151 bd  
8 de l'Hôpital, 75013, Paris, France; <sup>2</sup>Institute for Computational Engineering Sciences,  
9 Department of Engineering Sciences, Faculté des Sciences, de la Technologie et de  
10 Médecine, Université du Luxembourg, Campus Kirchberg, 6, rue Coudenhove-Kalergi,  
11 L-1359, Luxembourg.; <sup>3</sup>Institut de Mécanique et d'Ingénierie (I2M), Univ. Bordeaux,  
12 CNRS, ENSAM, Bordeaux INP, 33400 Talence, France.; <sup>4</sup>Institut d'Optique Graduate  
13 School, CNRS UMR 5298, F-33400 Talence, France.

14

15 **Abstract** Spheroids encapsulated within alginate capsules are emerging as suitable *in vitro*  
16 tools to investigate the impact of mechanical forces on tumor growth since the internal tumor  
17 pressure can be retrieved from the deformation of the capsule. Here we focus in particular on  
18 the Cellular Capsule Technology (CCT).

19 We show that a modeling approach accounting for the triphasic nature of the spheroid (it  
20 consists of extracellular matrix, tumor cells and interstitial fluid) offers a new perspective of  
21 analysis revealing that the pressure retrieved experimentally is representative of the average  
22 stress state in the multiphase continuum, so it cannot be interpreted as a direct picture of the  
23 pressure sustained by the tumor cells.

24 A multiphase reactive poro-mechanical model is cross-validated and proposed here as a suitable  
25 digital twin of the CCT experiment. Parameter sensitivity analyses on the digital twin allows us to  
26 show that the main parameters determining the encapsulated growth configuration are different  
27 from those which drive growth in free condition, confirming that radically different phenomena  
28 are at play. Multiphase reactive poro-mechanics emerges here as an exceptional theoretical  
29 framework to deeply understand CCT experiments, to confirm their hypotheses or further  
30 improve their design.

31

## 32 **Introduction**

33 As a tumor grows, it deforms surrounding living tissues, which causes strains and associated stresses.  
34 Mechano-biology focuses on these mechanical forces and their interplay with biological processes  
35 which has been extensively studied experimentally (*Helmlinger et al. (1997)*). Within this context,  
36 current mathematical models of tumor growth are becoming more and more reliable, comple-  
37 ment experiments and are useful tools for understanding, explaining and building upon these  
38 experimental findings *Jain et al. (2014)*.

39 This article focuses on the Cellular Capsule Technology (CCT), an experimental protocol developed  
40 by some of us in *Alessandri et al. (2013)* where multi-cellular tumor spheroids (MCTS) are cultured  
41 within spherical porous alginate capsules. These last, after confluence (*i.e.* when the MCTS comes  
42 in contact with the inner wall), work as mechanosensors; indeed, from their deformation one can  
43 retrieve the stress state within the MCTS. The interaction pressure between the MCTS and the cap-  
44 sule, coming from the basic action-reaction principle, is a capital information since as envisioned  
45 in *Alessandri et al. (2013)* could enable prediction of stress-induced phenotype alterations to char-  
46 acterize cell invasiveness. To this aim it is essential to quantify the critical pressure which induces  
47 the phenotype switch. Notably, it is also relevant to quantify the characteristic time of this process  
48 since one can infer that a relatively high pressure sustained by cell during a relatively short time  
49 does not lead to phenotype modifications.

50 Using the measured interaction pressure as a direct discriminant to predict the occurrence of the  
51 phenotype switch is very attractive also due to the simplicity of the concept. However, mechanistic  
52 digital twinning of the CCT experiment reveals here that directly linking the interaction pressure  
53 and the phenotype switch could be a simplistic shortcut since behind the simplicity (in the good  
54 sense of the word) of the MCTS-capsule concept, there is a behavior which is not trivially explain-  
55 able with basic physical concepts. Actually, the interaction pressure is a quite overall consequence  
56 encompassing several mechanisms at a lower level of description. The mechanics of porous media,  
57 on which is founded the proposed digital twin of the CCT experiment in this contribution, has  
58 emerged here as an excellent paradigm to model and possibly reveal these mechanisms offering  
59 a new perspective from which one can better interpret and exploit results of the CCT.

60 It is important to notice that the internal structure of the MCTS is heterogeneous so viewing or  
61 modeling the MCTS as a homogeneous continuum is not correct from the mechanical point of view.  
62 Hence, the MCTS is modeled here as a multiphase continuum consisting of tumor cells, interstitial  
63 fluid and an extracellular matrix which provides a certain stiffness to the multiphase continuum.  
64 A direct consequence of the multiphase modeling is that we observe that in the post-confluence  
65 phase while cells are compressed (positive pressure) the interstitial fluid pressure is negative. This  
66 fact has a rational explication. Actually, an intake of mass (and volume) is needed from the external  
67 medium since the MCTS-capsule system increases its size. Equally interesting is the role of the ECM  
68 scaffold which is submitted to the effective stress, in the sense of porous media mechanics, and  
69 not to the measured interaction pressure. Indeed, the pressure measured experimentally is repre-  
70 sentative of the total stress tensor (the Cauchy stress tensor), so it provides an averaged picture of  
71 the real situation where each phase of the system is submitted to its own stress state. Mathemati-  
72 cal modeling enables retrieving of the stress of each phase from the Biot's effective stress principle  
73 and the adopted multiphase formulation (the model is founded on the rigorous framework pro-  
74 vided by the Thermodynamically Constrained Averaging Theory of *Gray and Miller (2014)*).

75 To guarantee the scientific relevance of numerical results the reliability of the model is demon-  
76 strated adopting a crossing validation methodology. This has allowed a step-by-step customiza-  
77 tion of the mathematical model, obtaining a mechanistic formulation which remains predictive  
78 also when the experimental conditions of CCT experiment are modified. Systematic sensibility  
79 analyses have been helpful for the analysis and interpretation of results, allowing for quantifica-  
80 tion of the relative relevance of mechanisms underlying tumor growth phenomenology.

81 The effective digital twinning of the MCTS-capsule system and emerging biophysical outcomes  
82 from the perspective of multiphase porous media mechanics constitute together the novelty of  
83 this work. Differently from existing modeling approaches, which are often phenomenological and  
84 either so simplistic or so complex that their utility is very weak, the proposed modeling approach  
85 is mechanistic and contains the suitable degree of complexity to be representative such a kind of  
86 experiments.

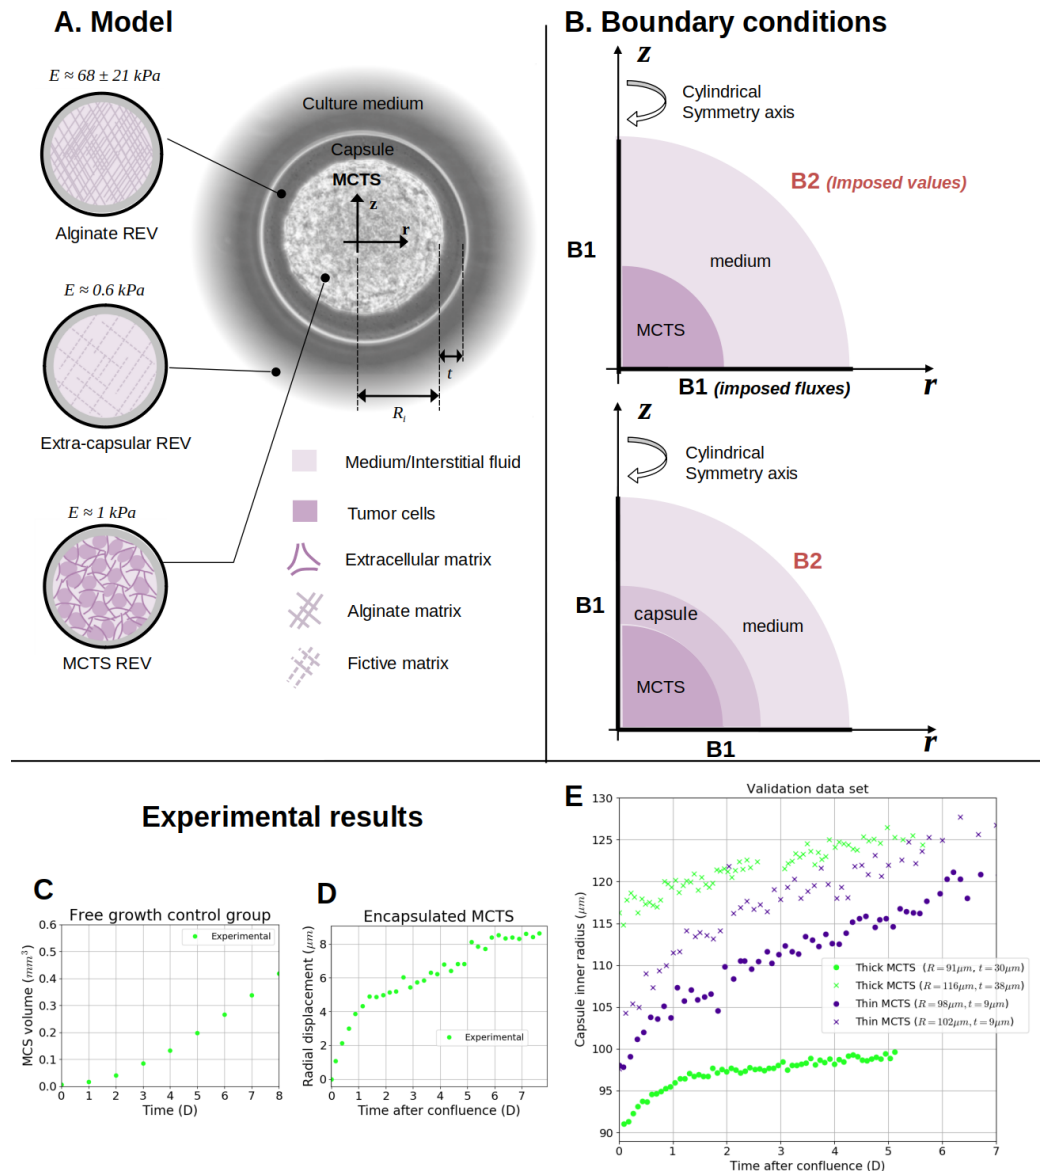

**Figure 1.** The capsule model. **A** Geometrical description of the capsule and assumed representative elementary volumes (REV): Three spatial domains modeled within the same mathematical framework: MCTS REV (consisting of tumor cells, interstitial fluid (IF) and extracellular matrix), the alginate shell (only IF phase within a solid scaffold of Young Modulus  $E = 60\text{KPa}$ ) and extra-capsular domain (only IF phase within a fictive solid scaffold of Young Modulus  $E = 0.6\text{KPa}$ ) enforced by the theoretical framework. **B** Computational boundary condition for the free (left) and confined (right) MCTS (see Methods and Model section), *In silico* reproduction process subsection). **C-E** Experimental input data. **C** Free MCTS control group, the volume is monitored over a time span of 8 days. **D** Encapsulated MCTS, the strain of a capsule (inner radius  $R = 100\mu\text{m}$  and thickness  $t = 34\mu\text{m}$ ) is monitored a time span of 8 days. **E** Validation data set: two capsules, denoted as thick ( $R = 91\mu\text{m}$ ,  $t = 30\mu\text{m}$ ) and ( $R = 116\mu\text{m}$ ,  $t = 38\mu\text{m}$ ); two capsules, denoted as thin ( $R = 98\mu\text{m}$ ,  $t = 9\mu\text{m}$ ) and ( $R = 102\mu\text{m}$ ,  $t = 9\mu\text{m}$ ). Their strains are monitored over a time span of 5 to 7 days.

## 87 **Methods and Model**

88 CCT offers an ideal framework to quantitatively assess the influence of mechanical stresses and its  
89 coupling with other biophysical factors impacting tumor cells proliferation and metabolism. Input  
90 data for the mathematical model can be retrieved from the CCT experimental conditions; further-  
91 more, numerical results in term of pressure and displacement can be compared with those mea-  
92 sured experimentally. This motivated the selection of CCT as reference experiment.

93 For the sake of clarity, the experimental observations reported by *Alessandri et al. (2013)* together  
94 with some additional data provided by the authors are briefly recalled in subsection here-under.  
95 The mathematical model and the *in silico* reproduction process are then presented.

### 96 **Encapsulated MCTS: experimental procedure and observed phenomenology**

97 MCTS cultures have been developed to overcome the constraints of 2D cultures, *Cukierman et al.*  
98 *(2001)*, and investigate biophysical aspects (such as those involving integrins, the differentiation of  
99 epithelial cells, or the efficient delivery of a therapeutic agent) for which accounting the 3D nature  
100 of the tumor cell aggregate is essential.

101 MCTS can be cultured in free or confined conditions. *Alessandri et al. (2013)* recently proposed the  
102 CCT for developing confined MCTS cultures aiming at disclosing the interplay between the tumor  
103 and confinement mechanical forces which inhibit tumor growth *Helmlinger et al. (1997)*, influence  
104 cell differentiation (mechanotransduction) and the acquisition of a cancerous phenotype *Paszek*  
105 *et al. (2005)*. The developed method is based on the encapsulation and growth of cells inside per-  
106 meable, elastic, hollow microspheres for the production of size-controlled MCTS. Alginate is used  
107 as a biomaterial for the encapsulation since its permeability permits the free flow of nutrients and  
108 oxygen and ensure favorable conditions for cellular growth without requiring additional molecules  
109 that could be potentially toxic for the MCTS.

110 Spherical alginate capsule with a diameter of a few hundreds of microns are built using a microflu-  
111 idic co-extrusion device: the outer sheath is made of a sodium alginate solution; an intermediate  
112 compartment contains a calcium-free medium; and the inner core is composed of the cell suspen-  
113 sion (CT26 mouse colon carcinoma). Performing extrusion in the air, the liquid jet is fragmented  
114 into droplets (due to Plateau-Rayleigh instability) which, upon contact with a calcium bath, readily  
115 crosslink as shells encapsulating cells (alginate undergoes gelation in the presence of divalent ions).  
116 The capsule allows convection of interstitial fluid and diffusion of nutrients species, growth factors  
117 and drugs through its surface; however, thanks to the alginate pores' size (of the order of 20 nm),  
118 cells cannot escape. The capsule therefore serves as micro-compartment for the 3D cell culture.  
119 During growth *in vivo*, the tumor deforms its surroundings which reacts with a confinement pres-  
120 sure. The mechanism is similar to what happens in the CCT experiment: during cell proliferation,  
121 the fraction of capsule volume occupied by cells increases until the capsule is filled (confluence);  
122 then the tumor spheroid starts to strongly interact with the capsule and deforms it. After conflu-  
123 ence, the alginate capsule, deformed by the MCTS, responds with a confinement pressure due to  
124 action-reaction principle. This confinement pressure and non-optimal oxygenation of the MCTS  
125 core areas generate important measurable heterogeneities (necrosis, local increase in cell density,  
126 etc.) along the spheroid radius.

127 CCT allows generating capsules with desired size and shell thickness. This can be achieved by  
128 regulation of extrusion velocity and suitable geometrical adjustment of the co-extrusion device  
129 (see *Alessandri et al. (2013)* for more details). Before confluence, for all capsule thicknesses, the  
130 growth rate of the CT26 spheroid is almost the same as that of the free MCTS case, indicating that  
131 access to nutrients is not compromised by the presence of the alginate shell. After confluence, the  
132 behavior strongly deviates from that of the free MCTS case. Qualitatively, the same phenomenol-  
133 ogy is observed for all capsule thicknesses. However, results are quantitatively very different due  
134 to the different overall thickness of the alginate capsules.

135 The dilatation of the alginate capsule has been characterized as an elastic deformation with  
136 negligible plasticity and no hysteresis. Young's modulus was measured by atomic force microscopy

137 indentation and osmotic swelling, giving a range of  $68 \pm 21$  kPa *Alessandri et al. (2013)*. Thanks to  
138 the identified Young's modulus, capsules can be used as a biophysical dynamometer as a relation  
139 can be constructed which relates the variation of the inner pressure with radial deformation, mon-  
140 itored using video-microscopy.

#### 141 Experimental input data

142 Firstly, we considered the denoted training data set:

- 143 • for the free MCTS: the volume monitored over a time span of 8 days (*Figure 1C*);
- 144 • for the encapsulated MCTS: the strain of a capsule (inner radius  $R = 100\mu\text{m}$  and thickness  
145  $t = 34\mu\text{m}$ ) monitored for 8 days (*Figure 1D*);

146 The reliability of the mathematical model has been tested with the denoted validation data set  
147 (*Figure 1E*):

- 148 • Two capsules, denoted as thick ( $R = 91\mu\text{m}$ ,  $t = 30\mu\text{m}$ ) and ( $R = 116\mu\text{m}$ ,  $t = 38\mu\text{m}$ );
- 149 • Two capsules, denoted as thin ( $R = 98\mu\text{m}$ ,  $t = 9\mu\text{m}$ ) and ( $R = 102\mu\text{m}$ ,  $t = 9\mu\text{m}$ );

150 Sparse experimental data have been used to qualitatively measure the model emerging outcomes:  
151 the measurements of cell states (quiescent, proliferative, necrotic) of a small thick capsule ( $R =$   
152  $50\mu\text{m}$ ,  $t = 12\mu\text{m}$ ), 26 hours after confluence, and the states of a  $R = 50\mu\text{m}$  free MCTS (see *Figure 6A,*  
153 *B*).

#### 154 **The mathematical model: a physics-based description of the MCTS-capsule system**

155  
156 Our understanding of the physics and mathematical modeling in oncology has made significant  
157 progress owing to our improved ability to measure physical quantities associated with the devel-  
158 opment and growth of cancer. Health research centers have been collaborating with engineers,  
159 mathematicians and physicists to introduce mechano-biology within clinical practice. This is partic-  
160 ularly true for biochemical and genetic approaches which have been validated in patient cohorts,  
161 such as *e.g.* for the prediction of surgical volume for breast and prostate locations *Edgerton et al.*  
162 *(2011)*, *Lorenzo et al. (2019)*, and for the prediction of the chemical agent diffusion for pancreatic  
163 cancer *Koay et al. (2014)*.

164 Three physics-based modeling approaches are currently used to model cancer: discrete, contin-  
165 uum and hybrid (the reader is referred to more detailed descriptions in the work of *Lowengrub*  
166 *et al. (2010)*). Among continuum models, poromechanical ones (*e.g.* see *Sciumè et al. (2013)*;  
167 *Mascheroni et al. (2016)*) emerge today as valid approaches to model the interplay between biome-  
168 chanical and biochemical phenomena. Following this promising trend, the multiphase reactive  
169 poro-mechanical model of *Sciumè et al. (2014a)* is here further developed and customized for dig-  
170 ital twinning of CCT in order to reproduce numerically the experiment of *Alessandri et al. (2013)*  
171 gaining additional information not yet measurable *in vitro*.

172 Our approach considers the tumor tissue as a reactive porous multiphase system: tissue extra-  
173 cellular matrix constitutes the solid scaffold while interstitial fluid (IF) and tumor cells (TC) are mod-  
174 eled as fluid phases. Hence, the mathematical model is governed by momentum and mass conser-  
175 vation equations of phases and species constituting the MCTS-capsule system. Once the capsule  
176 is formed, three different spatial domains can be defined (*Figure 1A*): the intra-capsular domain  
177 where the tumor cells phase ( $t$ ), the medium/interstitial fluid phase ( $l$ ) and the extra-cellular matrix  
178 phase ( $s$ ) coexist; the alginate shell domain, where a solid scaffold phase ( $s$ ) and the medium fluid  
179 phase ( $l$ ) coexist; and the extra-capsular domain where the only medium fluid phase ( $l$ ) exist. In  
180 these three domains strains are calculated according to the theory of poro-elasticity which always  
181 assumes the presence of a certain solid phase volume fraction constituting the porous/fibrous  
182 medium. Therefore, a certain proportion of the solid phase must always be present even in the  
183 extra-capsular domain where it does not exist. Despite this unrealistic condition enforced by the

184 theoretical framework, the reliability of the model is only weakly affected, because the stiffness of  
185 this fictitious solid phase is two orders of magnitude lower than that of the alginate solid scaffold  
186 (**Figure 1A**). A unique physical model is defined for the three domains, with some penalty param-  
187 eters (*e.g.* a low intrinsic permeability) avoiding cell infiltration in the alginate shell domain. Oxygen  
188 advection-diffusion within the medium/interstitial fluid phase is considered, oxygen acting as the  
189 limiting nutrient of TC, as prolonged hypoxia leading to the cell necrosis.  
190 Starting from the general form of conservation equations provided by TCAT, the final system of  
191 governing equations is obtained. It consists of four equations:

- 192 • the  $t$  phase mass conservation
- 193 • the  $l$  phase mass conservation
- 194 • the advection-diffusion equation of oxygen in the  $l$  phase
- 195 • the momentum conservation equation of the multiphase system

196 We have four primary variables: three are scalar and one vectorial.

- 197 •  $p^l$  the pressure of the medium/interstitial fluid
- 198 •  $p^{tl}$  the pressure difference between the cell phase  $t$  and the medium/interstitial fluid  $l$
- 199 •  $\omega^{\tilde{n}}$  the mass fraction of oxygen
- 200 •  $\mathbf{u}^s$  the displacement of the solid scaffold

201 We also have two internal variables: the porosity  $\varepsilon$  and the TC necrotic mass fraction  $\omega^{Nt}$ . The  
202 evolution of porosity is calculated from the mass conservation equation of the solid phase while  
203 the mass fraction of necrotic cells is updated according to the tissue oxygenation in the TC phase  
204 (see **Sciumè et al. (2013)**). We introduce two kinds of closure relationships for the system: me-  
205 chanical and mechano-biological. Details about derivation of the governing equations and these  
206 constitutive relationships are provided in appendix Appendix A. The Multiphase System.

#### 207 Initial parameters settings

208 As prescribed in **Brady and Enderling (2019)**, aiming biological or clinical relevancy demands to  
209 investigate each choice of the initial values of the parameters. Some parameters are of physical  
210 nature (the IF dynamic viscosity, the oxygen mass fraction inside cell cultures), they can be, even  
211 with difficulties, measured or at least their values will be compared to the physical soundness.  
212 Others parameters belongs more specifically to bio-poromechanical models in the mathematical  
213 oncology fields. Some of them have a quite theoretical nature (*e.g.* the 'permeability' of the ECM)  
214 while others have been experimentally measured at the cellular level (*e.g.* the oxygen consumption  
215 rate of EMT6/Ro cell line in **Casciari et al. (1992)**). For these parameters we have taken values that  
216 previous numerical studies (**Chignola et al. (2000)**, **Sciumè et al. (2014a)**, **Mascheroni et al. (2016)**,  
217 **Santagiuliana et al. (2019)**) have used for MCTS cultured with other cell lines (human glioblas-  
218 toma multiforme and human malignant melanocytes), averaged these values, that we will denote  
219 '*generic*', and used them as initial guess for identification of parameters of our CT26 cell line based  
220 MCTS.

221 When experimental data did not provide any relevant information on a parameter (*e.g.* for ECM  
222 stiffness and permeability) and the sensitivity of the solution to their variation were insignificant  
223 (< 1% of the variance of the solution), we chose to fix them at their generic value.

224 The following parameters have a non negligible influence on the model outputs, and the closure  
225 relationships they belong are explained in detail in Appendix A. The Multiphase System:

- 226 •  $\mu_t$  the TC dynamic viscosity (eq.19)
- 227 •  $a$  the parameter tuning the joint impact of the ECM thinness and cell surface tension (eq.23)
- 228 •  $\gamma_g^t$  the TC growth rate (eq.26)
- 229 •  $\gamma_g^{nl}$  and  $\gamma_0^{nl}$  the oxygen consumption rate due to growth and quiescent metabolism respectively  
230 (eq.29)



231 Two other parameters,  $p_1$  and  $p_{crit}$ , are introduced in this modelling framework. They represent  
 232 thresholds which govern the inhibition of the proliferation (eq.28) of cancer cells. The initial guess  
 233 of  $p_{crit}$  have been chosen according to the work of *Helmlinger et al. (1997)* and *Paszek et al. (2005)*,  
 234 and the value of  $p_1$  has been set by observation of the experimental data.

### 235 In-silico reproduction process

236 From the computational point of view, we aimed to a light and adaptable process: free, open  
 237 source and compatible with any 2D or 3D geometry. For the model validation, we followed the  
 238 convention of mathematical oncology proposed in *Brady and Enderling (2019)*: two distinct sets of  
 239 data for optimisation and validation, the parameters set being fixed before validation. To measure  
 240 the quality of the fits, we followed the prescription of *Benzekry et al. (2014)*: the root mean square  
 241 error (RMSE) relatively to a reference, specified each time. The error on the numerical quantity  
 242  $\xi_{num}$  relative to a reference  $\xi_{ex}$ , evaluated at  $n$  points is:

$$RMSE(\xi_{num}, \xi_{ex}, n) = \sqrt{\frac{1}{n} \sum_{k=1}^n \left( \frac{\xi_{ex}(k) - \xi_{num}(k)}{\xi_{ex}(k)} \right)^2} \quad (1)$$

### 243 Computational framework

244 We implemented the above model in Python and C++ within the FEniCS framework *Alnæs et al.*  
 245 *(2015)*, with an incremental monolithic resolution of the mixed finite element (FE) formulation. All  
 246 the details and analytical verification of the FE formulation can be found in Appendix B. Computa-  
 247 tional framework.

248 The *Figure 1.B* shows the two modeled configurations of MCTS (the free on the left and the con-  
 249 fined on the right). Each mesh is a half of a sphere, because we also exploit symmetry with respect  
 250 to a diametrical plane. For the three scalar variables, we prescribed Dirichlet boundary conditions  
 251 along the outer radius of the domain  $p^l = 0$ ,  $p^l = 0$ ,  $\omega^{nl} = 4.2e^{-6}$  and no flux condition at  $r = 0$   
 252 and  $z = 0$ . For the ECM displacement field  $\mathbf{u}^s$ , slip conditions  $u_r^s = 0|_{r=0}$  and  $u_z^s = 0|_{z=0}$  are used, and  
 253 Dirichlet conditions  $\mathbf{u}^s = \mathbf{0}$  at the outer radius of the domain (see *Figure 1.B*).

### 254 Sensitivity analysis, parameter identification and model validation

255 A global sensitivity analysis by Sobol indices was performed on the training data set to assess the  
 256 sensitivity of the FE solution to the input parameters, both on the free and encapsulated MCTS.

- 257 • In the first order analysis, the 7 parameters ( $mu_r$ ,  $a$ ,  $\gamma_g^l$ ,  $\gamma_g^{nl}$ ,  $\gamma_0^{nl}$ ,  $p_1$ ,  $p_{crit}$ ) were disturbed one at  
 258 a time respectively to a  $[-10, -5, -2, -1, +1, +2, +5, +10]\%$  grid. The variations of the solution  
 259 were interpreted as a linear model, and the influence of a parameter  $\alpha$  was deduced from  
 260 the slope  $\theta_\alpha$  of the linear fit. The Sobol index  $S_\alpha$  was calculated as follows:

$$S_\alpha = \frac{\theta_\alpha^2}{\sum_i \theta_i^2} \quad (2)$$

- 261 • The 21 tuples were evaluated at the 2 extreme values of the grid for each configuration. The  
 262 polynomial model allowed to compute two types of Sobol indices:  $S_i$  for the influence of the  
 263 parameter  $i$  and  $S_{ij}$  for the influence of each couple  $(i, j)$  of parameters.

$$S_i = \frac{\theta_i^2}{\sum_i \theta_i^2 + \sum_{ij, i>j} \theta_{ij}^2} \quad \text{and} \quad S_{ij} = \frac{\theta_{ij}^2}{\sum_i \theta_i^2 + \sum_{ij, i>j} \theta_{ij}^2} \quad (3)$$

264 All the details of the process, auxiliary parameters and cost functions can be found in Appendix C.  
 265 Sensitivity analysis.

266 For both configurations, the optimization procedure was based on sensitivity profiles, that is to say,

<sup>1</sup>which corresponds, according to Henry's law, to 90mmHg, the usual oxygen mass fraction in arteries (see *Ortiz-Prado et al. (2019)*)

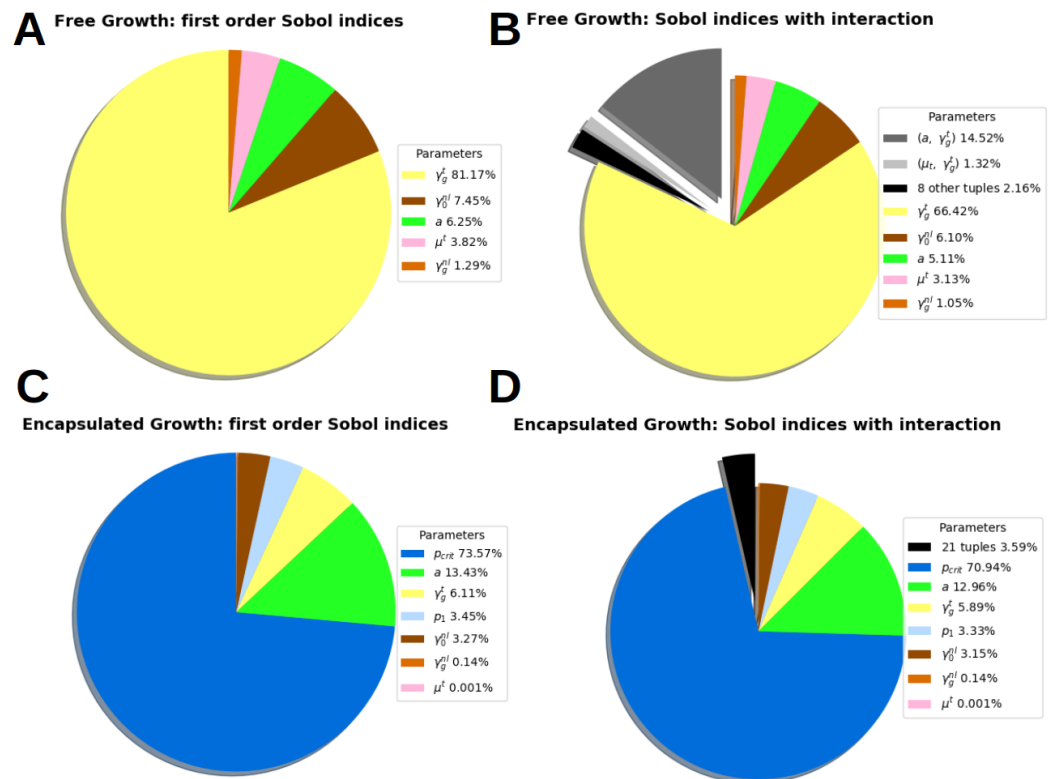

**Figure 2.** Sobol indices of the solution sensitivity on 7 parameters:  $\mu^t$  the TC dynamic viscosity, the parameter  $a$  accounting for the joint impact of the ECM thickness and cell surface tension,  $\gamma_g^t$  the TC growth rate,  $\gamma_g^{nl}$  and  $\gamma_0^{nl}$  the oxygen consumption rate due to growth and quiescent metabolism respectively,  $p_1$  and  $p_{crit}$ , two thresholds which govern the pressure-induced inhibition of the TC proliferation. Free MCTS configuration, **A**, First order analysis: Only 5 parameters remain, the governing parameter is  $\gamma_g^t$ , the tumor cells growth rate, the sensitivity of the solution on the pressure parameters,  $p_1$  and  $p_{crit}$ , is 0. **B** Interaction: among 10 parameters tuples, one is significant ( $a, \gamma_g^t$ ) 14.5% of the solution variance. Thus, these two parameters are not independent and should be identified together. The total variance of the solution shows that, considering all the interactions, the influence of each parameter alone is not qualitatively changed:  $\gamma_g^t$  from 81.1% to 66.4%,  $\gamma_0^{nl}$  from 7.4% to 6.1%,  $a$  from 6.2% to 5.1%. Encapsulated MCTS configuration, **C**, First order analysis: the governing parameter is  $p_{crit}$  the inhibitory pressure of tumor cells growth (73.5% of the solution variance). **D** Interaction: the sum of 21 parameters tuples represents 3.6% of the solution variance (the detail of 21 tuples can be found in Appendix C. Sensitivity analysis, table 6).

267 we optimized the parameters that gathered 90% of the variance of the solution. The selected pa-  
 268 rameters were identified by a Nelder-Mead simplex algorithm. In the encapsulated configuration,  
 269 the parameters of the MCTS cell-line were identified in an alginate capsule with a stiffness of mean  
 270 experimental value:  $E = 68$  kPa. The optimized parameters set is shared by both configurations.  
 271 To evaluate the reliability of the identified parameters, an author of this article and member of the  
 272 team of *Alessandri et al. (2013)* have jointly provided unpublished experimental results of encap-  
 273 sulated MCTS, both thick and thin, namely the validation data set. As their alginate stiffness was  
 274 not known (the Young's modulus of the alginate was estimated to be  $E = 68 \pm 21$  kPa), two simula-  
 275 tions were run for each capsule with the extreme values of  $E$ . This provided the range of modeling  
 276 possibilities of the identified parameters.

## 277 Results

278 Based on a detailed sensitivity study, the optimized set of parameters was tested and cross-validated  
 279 on unpublished experimental results (*Figure 1E*) provided by the same team of *Alessandri et al.*  
 280 (*2013*). Numerical simulation also provides a wide output of qualitative results which are presented



**Table 1.** Parameters for the CT26 cell line. Source of the generic values: *Chignola et al. (2000)*, *Sciumè et al. (2014a)*, *Mascheroni et al. (2016)*, *Santagiuliana et al. (2019)*

| Parameter                    | Symb.           | Generic           | Unit                   | Optimized            |
|------------------------------|-----------------|-------------------|------------------------|----------------------|
| ECM network thinness         | $a$             | 800               | Pa                     | 890                  |
| Dynamic viscosity of TC      | $\mu_t$         | 36                | Pa.s                   | negligible           |
| TC growth rate               | $\gamma_g^t$    | $4 \cdot 10^{-2}$ | kg/(m <sup>3</sup> .s) | $3.33 \cdot 10^{-2}$ |
| TC growth $O_2$ consump.     | $\gamma_g^{nl}$ | $4 \cdot 10^{-4}$ | kg/(m <sup>3</sup> .s) | negligible           |
| TC metabolism $O_2$ consump. | $\gamma_0^{nl}$ | $6 \cdot 10^{-4}$ | kg/(m <sup>3</sup> .s) | $6.65 \cdot 10^{-4}$ |
| Start TC growth inhibitory   | $p_1$           | 1800              | Pa                     | 1432                 |
| Stop TC growth               | $p_{crit}$      | 4000              | Pa                     | 5944                 |

281 and interpreted. At the end of the section, we show that the model outputs allow to predict, with  
 282 a reasonably good accuracy, experimental TC saturation and its necrotic fraction, despite these  
 283 quantities have not been used for the model optimization.

### 284 Sensitivity analysis

285 *Figure 2* shows the results of first order and second-order interaction analyses, for the free and  
 286 encapsulated configurations respectively. Clearly distinct profiles were obtained.

287 In the free MCTS configuration, the governing parameter is  $\gamma_g^t$  the tumor cells growth rate (first  
 288 order index,  $S_{\gamma_g^t} = 81\%$ , with interactions  $S_{\gamma_g^t} = 66.4\%$ ). In decreasing order, we have two parame-  
 289 ters that are not negligible:  $\gamma_0^{nl}$  the oxygen consumption due to metabolism (first order index 7.45%,  
 290 with interactions 6.10%) and  $a$ , the parameter determining the joint impact of the ECM thinness  
 291 and cell surface tension (first order index 6.25%, with interactions 5.11%). The important difference  
 292 between the 2 Sobol indices of  $\gamma_g^t$  is explained by the only non negligible interaction between two  
 293 parameters:  $\gamma_g^t$  and  $a$  ( $S_{(a, \gamma_g^t)} = 14.5\%$ , see *Figure 2*, right). This important interaction is indicative  
 294 of the significant roles that ECM properties and cell-cell adhesion have on proliferative-migration  
 295 behavior (this is widely described in literature, see for instance *Paszek et al. (2005)*) and that our  
 296 modeling approach can reproduce mechanistically how these properties impact the overall ob-  
 297 served phenomenology of tumor growth. Thus, these two parameters are not independent and  
 298 should be identified together.

299 For all parameters perturbations in the first order and second-order interaction analyses, the pres-  
 300 sure of the TC phase  $p^t = p^l + p^{tl}$  was less than 1 KPa, thus the first threshold of growth inhibitory  
 301 due to pressure  $p_1$  was never reached and, *a fortiori*, the critical threshold of total inhibition  $p_{crit}$ .  
 302 Thus, the sensitivity of the FE solution to  $p_1$  and  $p_{crit}$  was 0. The 3 parameters  $\gamma_g^t$ ,  $a$  and  $\gamma_0^{nl}$  has there-  
 303 fore been optimized for the free configuration. For the encapsulated configuration, the governing  
 304 parameter is the critical inhibitory pressure  $p_{crit}$  (first order  $S_{p_{crit}} = 73.5\%$ , with interaction 70.9%).  $\gamma_g^t$ ,  
 305  $a$  and  $\gamma_0^{nl}$  has already been identified for the free configuration, the only non negligible parameter  
 306 remaining is  $p_1$  (first order index  $S_{p_1} = 3.4\%$ , with interaction 3.3%). The difference between Sobol  
 307 indices of first order and interactions is weak, indeed, the 21 parameters tuples gather only 3.6% of  
 308 the solution variance. Thus, in the encapsulated configuration the parameters can be considered  
 309 non-correlated and be identified separately.

310 Such results allow us to highlight that in the encapsulated configuration the mechanical constraint  
 311 is the phenomenon that determines the overall growth phenomenology provided by the mathe-  
 312 matical model.

### 313 Optimization

314 We identified the three governing parameters  $\gamma_g^t$ ,  $\gamma_0^{nl}$ ,  $a$  for the free MCTS configuration by the Nelder-  
 315 Mead simplex algorithm and fitted to the experimental data with a  $RMSE = 0.031$ . To be physically  
 316 relevant, the same parameters set should be shared by the two configurations. Hence, these three

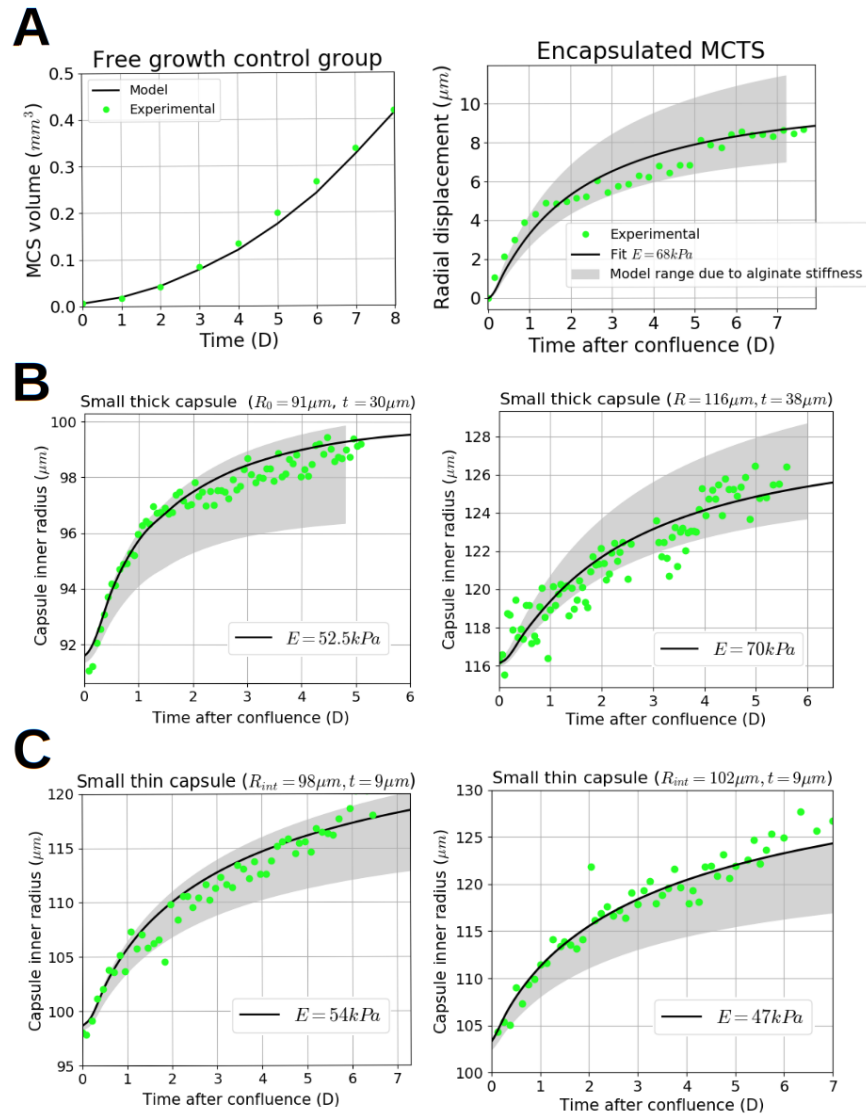

**Figure 3.** Validation of the optimized parameters. Alginate Young's was estimated in *Alessandri et al. (2013)* as  $E = 68 \pm 21$  kPa. Simulations with the extreme values of  $E$  give the range of possibilities of the optimized set predicted with the model. Experimental results, green dotted; Numerical results with the optimized parameters set, black; Modeling range, grey filled. **A**. Left, free MCTS control group, Time (Day) versus MCTS volume ( $\text{mm}^3$ ). Right, reference encapsulated MCTS (inner radius  $100\mu\text{m}$ , thickness  $34\mu\text{m}$ ), time (Day) versus radial displacement ( $\mu\text{m}$ ). Fit with  $E = 68\text{kPa}$ . **B** Validation of the identified parameters on 2 thick capsules. Time (Day) versus Capsule radius ( $\mu\text{m}$ ). The experimental points are in the modeling range. Both capsule fit with  $E = 52.5\text{kPa}$  and  $E = 70\text{kPa}$  respectively. **C** Partial validation of the identified parameters on 2 thin capsules. Time (Day) versus Capsule radius ( $\mu\text{m}$ ). Left, one capsule is fitted with  $E = 54\text{kPa}$ ; right, the experimental points are at the boundary of the modeling range.

317 parameters were injected within the encapsulated configuration and its two governing parameters  
318  $p_1, p_{crit}$  were identified using the same algorithm. We fitted the experimental data of the encapsu-  
319 lation with a  $RMSE = 0.124$ . **Figure 3A** shows the two configurations fitted with the following set  
320 of parameters:  $\gamma_g^i = 3.33 \cdot 10^{-2}$ ,  $\gamma_0^{nl} = 6.65 \cdot 10^{-4}$ ,  $a = 890$ ,  $p_1 = 1432$ ,  $p_{crit} = 5944$  (see Table 1). This set is  
321 cell-line specific, only relevant for CT26 mouse colon carcinoma.

### 322 Validation

323 Unpublished experimental results of encapsulated MCTS, both thick and thin, have been used as  
324 validation data set (**Figure 1E**). Each capsule had its own radius  $R$  and thickness  $t$  and two simula-  
325 tions have been run with the extreme experimental values of the alginate stiffness ( $E = 47\text{kPa}$  and  
326  $E = 89\text{kPa}$ ).

327 **Figure 3A** right shows the range of modeling possibilities of the identified parameters on the train-  
328 ing data ( $R = 100\mu\text{m}$ ,  $t = 34\mu\text{m}$ ), respectively to the alginate stiffness range. The parameters set  
329 was identified with the mean stiffness value ( $E = 68\text{kPa}$ ).

330 **Figure 3B** shows that the modeling range on two thick capsules is in accordance with the experi-  
331 mental results. Two fits with an alginate stiffness at  $E = 52.5\text{kPa}$  and  $E = 70\text{kPa}$  respectively are  
332 proposed.

333 The **Figure 3C** shows results relative to two thin capsules. The dynamics is properly reproduced  
334 by the model for both capsules which are importantly deformed (the strain is of 16% for the left  
335 one and 20% for the right one). Despite in the right case (that with  $R = 102\mu\text{m}$ ,  $t = 9\mu\text{m}$ ) the model  
336 shows some limitations (note that the proposed fit is at the minimum stiffness value  $E = 47\text{kPa}$ )  
337 the presented cross-validation demonstrates that this mechanistic mathematical model can adapt  
338 to different geometries and thickness without losing its relevance. Focusing on the left graphs in  
339 figures B and C we can note that, with the same parameters set and almost the same alginate  
340 stiffness ( $E_{B,Left} = 52.5\text{kPa}$  and  $E_{C,Left} = 54\text{kPa}$ ), the model reproduces experimental strain of 8%  
341 and 16% respectively. The difference between the two strains is induced by the geometrical effect  
342 due to the capsule thickness, which impacts on the evolution of internal stresses, cell growth and  
343 oxygen consumption.

### 344 Qualitative results and emerging outcomes

345 In addition to overall quantitative results, **Figure 4** and **Figure 5** provide details on the physical phe-  
346 nomena occurring during growth (from confluence to 85 hours after confluence) of a MCTS encap-  
347 sulated in a thick capsule with the same geometry used for identification of the input parameters  
348 of the mathematical model ( $R = 100\mu\text{m}$ ,  $t = 34\mu\text{m}$ ). These figures allow to quickly understand the  
349 importance of physics-based modeling, as it provides qualitative information that could be used to  
350 interpret the experimental process as a whole and to better understand the tumor growth process.  
351 **Figure 4** shows contours of oxygen, necrotic fraction, IF pressure, ECM displacement, TC pressure  
352 and TC saturation at confluence and 85 hours after. To gain information about the dynamics of  
353 these quantities, **Figure 5** shows them probed along the radius at confluence, 85 hours after, and  
354 at two intermediate times (28 and 56 hours).

355 **Figure 5A** and B show the interplay between oxygen consumption and necrosis. Indeed as men-  
356 tioned in the experiments, 85 hours after confluence, the viable space remaining for TC is a  $20\mu\text{m}$   
357 thick rim. This is explicit in **Figure 4**, upper right circle, NTC quarter. The comparison of **Figure 5F**  
358 and B shows a relation between the saturation of TC and their necrotic fraction. This is a basic  
359 experimental fact that, when the cells bodies collapse in a necrotic core, the aggregate density  
360 increases accordingly. **Figure 5D** and E allow to 'visualize' the overall dynamics of the process:  
361 the capsule displacement strongly increases after confluence due to the contact with tumor cells  
362 whose pressure rises from  $1.15\text{ kPa}$  at confluence to almost  $4\text{ kPa}$ , 85h after confluence. Beyond  
363 85h and until eight days after confluence, it was observed that the tumor cells pressure  $p' < p_{crit}$ .  
364 This is in accordance with the experiment as recorded in **Alessandri et al. (2013)** where it was re-  
365 ported that the MCTS continued to grow twelve days after confluence, even very slowly. The tumor

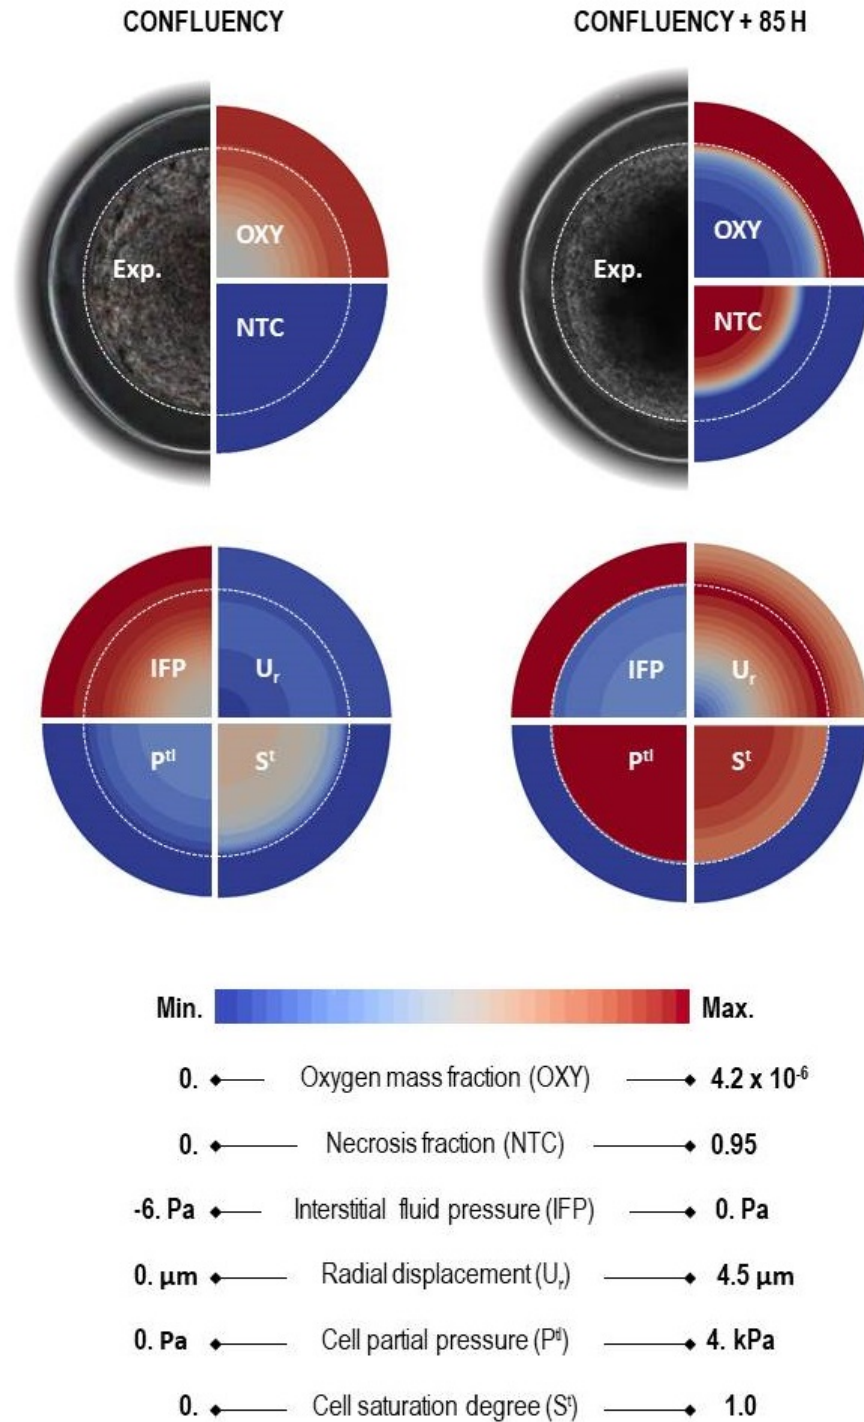

**Figure 4.** Experimental microscopy image augmented by 6 physical quantities from numerical results of the mathematical model: oxygen, necrotic tumor cells, interstitial fluid pressure, radial displacement, partial tumor cells pressure and tumor cells saturation. Left, at confluence. Right, 85 hours after confluence.

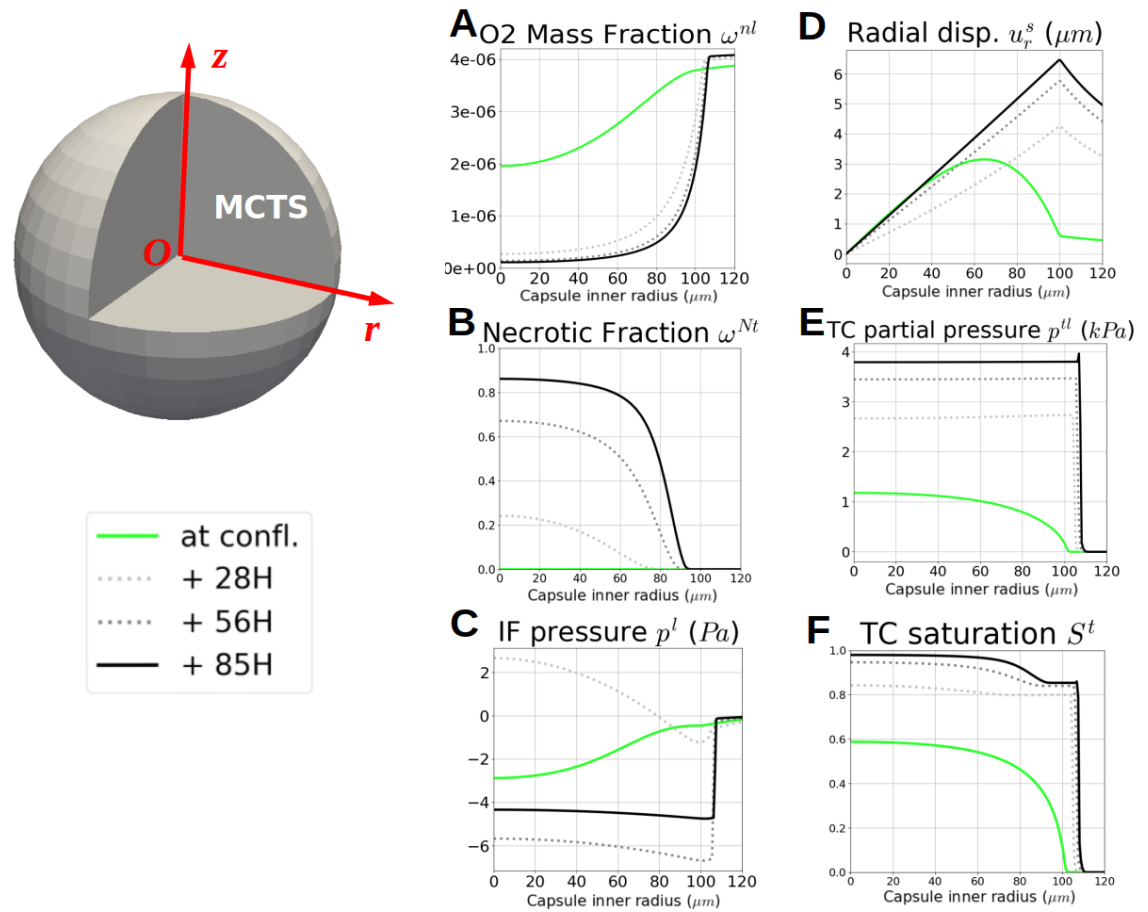

**Figure 5.** Quantities probed along the  $r = z$  line at confluence, 85 hours after, and two intermediate times (28 and 56 hours): **A** oxygen, **B** necrotic fraction, **C** IF pressure, **D** ECM displacement, **E** TC pressure and **F** TC saturation. **A** and **B**: as mentioned in the experiments, 85 hours after confluence the viable space remaining for TC is a 20  $\mu\text{m}$  thick rim. **C**: after confluence, IF is absorbed by growing TC, provoking a sucking phenomenon, as the cells activity decrease at the MCTS inner core, IF accumulates and its pressure becomes positive. As described in [Alessandri et al. \(2013\)](#), after 2 days of quick growth, the MCTS reaches a state of linear and slow evolution. **D** and **E**: the capsule displacement is driven by TC pressure with the same overall dynamic. **E**, **F** and **B**: relation between the saturation of TC and their necrotic fraction, the TC aggregate density increases with necrotic core.

366 cells pressure  $p^c$  does not determine directly the capsule deformation, which is more directly driven  
367 by the solid pressure,  $p^s$  (see definition eq.21 in the Appendix A. The Multiphase System). The pres-  
368 sure  $p^s$  is more representative of the average internal pressure obtained experimentally by inverse  
369 analysis (see Appendix C. Sensitivity analysis eq.39). At the confluence time,  $p^s$  is importantly lower  
370 than the pressure in the tumor cell phase since at that time the MCTS consists also of 40% of IF.  
371 After confluence the saturation of tumor cells increases progressively, so  $p^s$ , becomes closer to the  
372 pressure sustained by the cells.

373 In the presented physics-based approach, mass conservation is prescribed, so the growing MCTS,  
374 which increases in density and size, have to lead to a decreasing mass of interstitial fluid. This re-  
375 sult, which cannot be measured experimentally, is shown in **Figure 5** where a sucking phenomenon  
376 due to IF absorption by growing TC can be observed. The **Figure 5C** shows that after confluence  
377 the interstitial fluid pressure becomes positive during a while (see plot relative to 28h). Indeed,  
378 after confluence the initial gradient of IF pressure (green line in **Figure 5C**) reverses since cells in  
379 the proliferative peripheral areas move toward the core so IF has to go in the opposite direction,  
380 as imposed physically by mass conservation. After 2 days of quick growth, experimentally and nu-  
381 merically, the MCTS reaches a state of linear and slow evolution and from that point onward, the  
382 IF flux will not qualitatively change.

383 To further analyze the reliability of the mathematical model we also exploit additional data of cell  
384 states inside MCTS presented in **Alessandri et al. (2013)**. More specifically, we reproduced numer-  
385 ically a CT26-MCTS growing in free conditions and in a capsule having a radius of  $50\mu\text{m}$ . **Figure 6A**  
386 and **Figure 6B** present experimental cell densities (total, proliferative and necrotic) at  $50\mu\text{m}$  radius  
387 for the free MCTS and 26h after confluence for the confined MCTS. These experimental results are  
388 qualitatively compared with the numerical simulations (**Figure 6C** and **Figure 6D** for the free and  
389 confined cases respectively). Both configurations show a reasonable agreement with the experi-  
390 mental results, knowing that none of these quantities have been used for the parameters identifi-  
391 cation, this is a supplementary argument for the adaptability of this physical based modelling.

## 392 Discussion

393 We show in this paper the *in silico* reproduction of MCTS growth experiments in various physical  
394 conditions: free and encapsulated within alginate shells of different sizes and thicknesses. Thanks  
395 to a robust validation protocol, variance-based sensitivity analysis, distinct training and validation  
396 data sets, all these physical conditions have been successfully simulated by means of a bio-chemo-  
397 poromechanical mathematical model. It is important to notice that only one set of parameters,  
398 identified on a training data set (reported in **Figure 1C** and **Figure 1D**), has been used for all the  
399 numerical simulations performed.

400 In the frame of the parameter identification process a second order sensitivity analysis has re-  
401 vealed that the parameters of the model become almost independent under confinement (see  
402 **Figure 2D**). Results of sensitivity analyses also demonstrate, that if the tumor is free to grow the  
403 only influential parameters are the proliferation and the oxygen consumption rates. Conversely,  
404 when the tumor growth is constrained by the presence of the alginate capsule the value of the  
405 critical pressure beyond which mechanical stresses impact its growth is the main driver.

406 Sensibility studies have guided us on the development of bio-physically relevant constitutive rela-  
407 tionships enabling the formulation of a mathematical model which remains reliable even when the  
408 growth conditions of the MCTS are modified. This is an advancement with respect of other numer-  
409 ical studies based on poromechanics which are quite qualitative (e.g. **Sciumè et al. (2013)** and **San-  
410 tagiuliana et al. (2019)**) or solely connected with a reference experimental setup (e.g. **Mascheroni  
411 et al. (2016)**).

412 The mathematical model is the digital twin MCTS-capsule system since it takes into account mech-  
413 anistically its real multiphase nature; hence, the numerical results add new dimensions to the  
414 Cellular Capsule Technology. In particular, it is shown that the pressure estimated experimentally  
415 is illustrative of the evolution of the solid pressure,  $p^s$ , (in the sense of porous media mechanics,



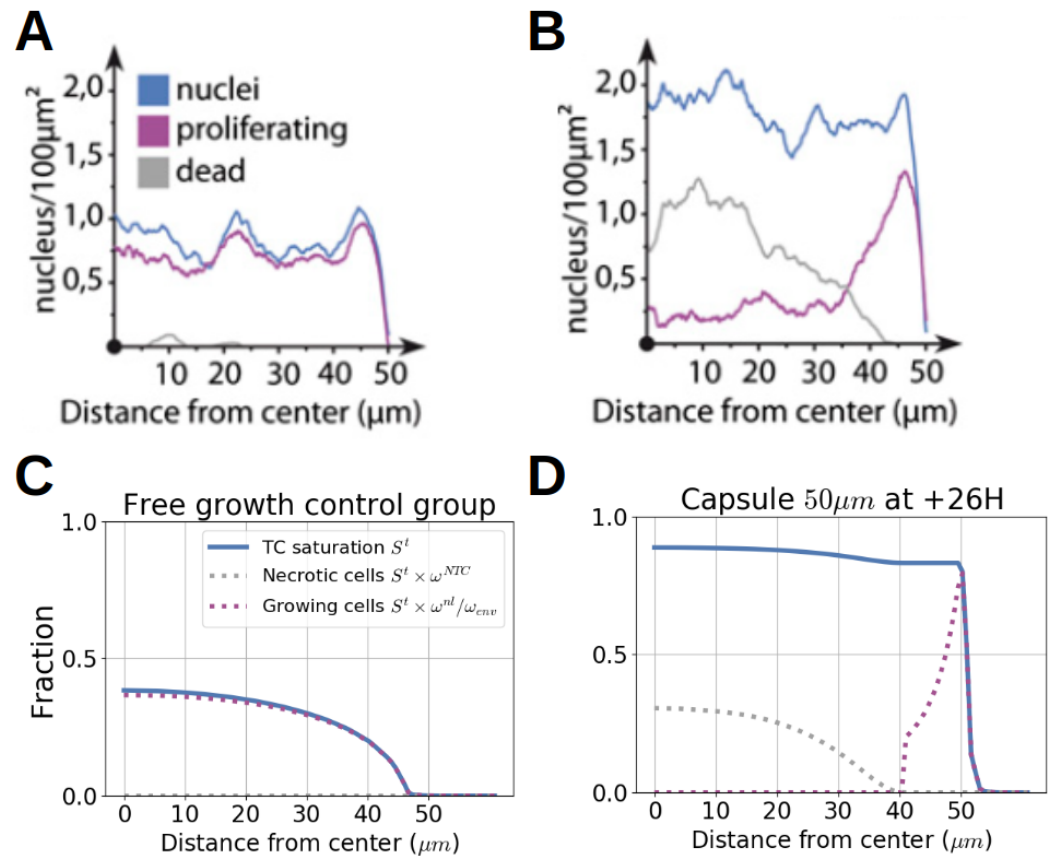

**Figure 6.** Quantification of proliferating and dead cells radial densities for free and confined CT26 spheroids: *in vitro-in silico* results. Experimental quantification of cell nuclei (blue), proliferating cells (purple), and dead cells (gray) along the radius for free, **A**, and confined, **B**, growth (from *Alessandri et al. (2013)*). Numerical results for 3 fractional quantities (TC Saturation  $S^t$ , blue, Necrotic saturation of TC  $\omega^{NTC}$ , gray dotted, Growing TC fraction  $\omega_{grow}^{TC}$  (see eq.31), purple dotted) vs distance from center in free, **C**, and encapsulated, **D**, configuration. TC saturation almost doubles between the two configurations, in encapsulation, necrotic fraction occupies almost half of the TC phase and only a thin rim of the MTCS is viable.

416 see eq.21 Appendix A. The Multiphase System) and not of the pressure sustained by the cells,  $p'$ .  
417 The pressure  $p'$  is always higher than  $p^*$  especially during the first phase after confluence (when the  
418 MTCS still contains an important volume fraction of IF). This fact is the direct consequence of the  
419 fact that each phase of the MCTS (*i.e.*, the ECM, the IF and the TC) has its own stress tensor and that  
420 the pressure obtained experimentally by inverse analysis is an average pressure. The multiphase  
421 approach also reveal other behaviours not measurable experimentally. We observe for instance  
422 that after confluence there is a suction of IF from the extra-capsular domain and that cells move  
423 from the proliferating rim towards the core of the MCTS where they become necrotic.  
424 In 2020s mathematical modeling in oncology begins to enter a stage of maturity; today mathemati-  
425 cal models of tumor growth tend to clinical applications and therefore must be really predictive and  
426 funded on measurable or at least quantifiable parameters having, as much as possible, a sound  
427 physical meaning. This motivated this paper which presents not only a mechanistic bio-chemo-  
428 poromechanical model but also a *modus procedendi* to achieve a suitable predicative potential and,  
429 with intercession of sensitivity analysis, to quantify relative relevance of mechanisms underlying  
430 tumor growth phenomenology.

### 431 Acknowledgments

432 The authors acknowledge ENSAM *Réseau Santé* (health institutional network), fondation Arts et  
433 Métiers and University of Luxembourg that have financially supported the project as well as the  
434 funding of the University of Luxembourg, of the DRIVEN H2020 TWINNING Project 2020driven.uni.lu

### 435 References

- 436 **Alessandri K**, Sarangi BR, Gurchenkov VV, Sinha B, Kießling TR, Fetler L, Rico F, Scheuring S, Lamaze C, Simon  
437 A, Geraldo S, Vignjević D, Doméjean H, Rolland L, Funfak A, Bibette J, Bremond N, Nassoy P. Cellular capsules  
438 as a tool for multicellular spheroid production and for investigating the mechanics of tumor progression in  
439 vitro. *Proceedings of the National Academy of Sciences*. 2013; 110(37):14843–14848. [https://www.pnas.org/  
440 content/110/37/14843](https://www.pnas.org/content/110/37/14843).
- 441 **Alnæs M**, Blechta J, Hake J, Johansson A, Kehlet B, Logg A, Richardson C, Ring J, Rognes M, Wells G. The FEniCS  
442 Project Version 1.5. *Archive of Numerical Software*. 2015; 3(100). [http://journals.ub.uni-heidelberg.de/index.  
443 php/ans/article/view/20553](http://journals.ub.uni-heidelberg.de/index.php/ans/article/view/20553).
- 444 **Benzekry S**, Lamont C, Beheshti A, Tracz A, Ebos JML, Hlatky L, Hahnfeldt P. Classical Mathematical Models for  
445 Description and Prediction of Experimental Tumor Growth. *PLOS Computational Biology*. 2014 08; 10(8):1–  
446 19. <https://doi.org/10.1371/journal.pcbi.1003800>, doi: 10.1371/journal.pcbi.1003800.
- 447 **Boffi D**, Brezzi F, Fortin M. *Mixed Finite Element Methods and Applications*. Springer; 2013.
- 448 **Brady R**, Enderling H. *Mathematical Models of Cancer: When to Predict Novel Therapies, and When Not to*.  
449 *Bulletin of Mathematical Biology*. 2019; doi: <https://doi.org/10.1007/s11538-019-00640-x>.
- 450 **Casciari JJ**, Sotirchos SV, Sutherland RM. Mathematical modelling of microenvironment and growth in EMT6/Ro  
451 multicellular tumour spheroids. *Cell Proliferation*. 1992; 25(1):1–22. [https://onlinelibrary.wiley.com/doi/abs/  
452 10.1111/j.1365-2184.1992.tb01433.x](https://onlinelibrary.wiley.com/doi/abs/10.1111/j.1365-2184.1992.tb01433.x), doi: 10.1111/j.1365-2184.1992.tb01433.x.
- 453 **Chignola R**, Schenetti A, Andrighetto G, Chiesa E, Foroni R, Sartoris S, Tridente G, Liberati D. Forecasting the  
454 growth of multicell tumour spheroids: implications for the dynamic growth of solid tumours. *Cell Prolifera-  
455 tion*. 2000; 33(4):219–229. <https://onlinelibrary.wiley.com/doi/abs/10.1046/j.1365-2184.2000.00174.x>.
- 456 **Cukierman E**, Pankov R, Stevens DR, Yamada KM. Taking Cell-Matrix Adhesions to the Third Dimension. *Science*.  
457 2001; 294(5547):1708–1712. <https://science.sciencemag.org/content/294/5547/1708>.
- 458 **Edgerton ME**, Chuang YL, Macklin P, Yang W, Bearer EL, Cristini V. A Novel, Patient-Specific Mathematical  
459 Pathology Approach for Assessment of Surgical Volume: Application to Ductal Carcinoma *in situ* of The Breast.  
460 *Analytical Cellular Pathology*. 2011; 34.
- 461 **Gray WG**, Miller CT. *Introduction to the Thermodynamically Constrained Averaging Theory for Porous Medium  
462 Systems*. Springer; 2014.

- 463 **Helminger G**, Netti PA, Lichtenbeld HC, Melder RJ, Jain RK. Solid stress inhibits the growth of multicellular  
464 tumor spheroids. *Nature Biotechnology*. 1997; 15(21):778–783.
- 465 **Jain RK**, Martin JD, Stylianopoulos T. The Role of Mechanical Forces in Tumor Growth and Therapy. *Annual Re-*  
466 *view of Biomedical Engineering*. 2014; 16(1):321–346. <https://doi.org/10.1146/annurev-bioeng-071813-105259>.
- 467 **Khan N**, Williams BB, Hou H, Li H, Swartz HM. Repetitive tissue pO<sub>2</sub> measurements by electron paramagnetic  
468 resonance oximetry: current status and future potential for experimental and clinical studies. *Antioxidants*  
469 *& redox signaling*. 2007; 9(8):1169–1182.
- 470 **Koay EJ**, Truty MJ, Cristini V, Thomas RM, Chen R, Chatterjee D, Kang Y, Bhosale PR, Tamm EP, Crane CH, Javle  
471 M, Katz MH, Gottumukkala VN, Rozner MA, Shen H, Lee JE, Wang H, Chen Y, Plunkett W, Abbruzzese JL, et al.  
472 Transport properties of pancreatic cancer describe gemcitabine delivery and response. *The Journal of clinical*  
473 *investigation*. 2014; 124(4):1525–1536.
- 474 **Lorenzo G**, Hughes TJR, Dominguez-Frojan P, Reali A, Gomez H. Computer simulations suggest that prostate en-  
475 largement due to benign prostatic hyperplasia mechanically impedes prostate cancer growth. *Proceedings*  
476 *of the National Academy of Sciences*. 2019; 116(4):1152–1161. <https://www.pnas.org/content/116/4/1152>.
- 477 **Lowengrub JS**, Frieboes HB, Jin F, Chuang YL, Li X, Macklin P, Wise SM, Cristini V. Nonlinear modelling of cancer:  
478 bridging the gap between cells and tumours. *Nonlinearity*. 2010; 23(1).
- 479 **Mascheroni P**, Stigliano C, Carfagna M, Boso DP, Preziosi L, Decuzzi P, Schrefler BA. Predicting the growth of  
480 glioblastoma multiforme spheroids using a multiphase porous media model. *Biomechanics and Modeling*  
481 *in Mechanobiology*. 2016; 15(1):1215–1228.
- 482 **Ortiz-Prado E**, Dunn JF, Vasconez J, Castillo D, Viscor G, Warner F, Zucker SW. Partial pressure of oxygen in the  
483 human body: a general review. *American journal of blood research*. 2019; 9(1):1–14.
- 484 **Paszek MJ**, Zahir N, Johnson KR, Lakins JN, Rozenberg GI, Gefen A, Reinhart-King CA, Margulies SS, Dembo M,  
485 Boettiger D, Hammer DA, Weaver VM. Tensional homeostasis and the malignant phenotype. *Cancer cell*.  
486 2005; 8:241–254.
- 487 **Santagiuliana R**, Milosevic M, Milicevic B, Sciumè G, Simic V, Ziemys A, Kojic M, Schrefler BA. Coupling tumor  
488 growth and bio distribution models. *Biomedical microdevices*. 2019; 21.
- 489 **Sciumè G**, Ferrari, Schrefler BA. Saturation–pressure relationships for two- and three-phase flow analogies for  
490 soft matter. *Mechanics Research Communications*. 2014d; 62:132–137.
- 491 **Sciumè G**, Gray WG, Hussain F, Ferrari M, Decuzzi P, Schrefler BA. Three phase flow dynamics in tumor growth.  
492 *Computational Mechanics*. 2014c; 53(3):465–484.
- 493 **Sciumè G**, Santagiuliana R, Ferrari M, Decuzzi P, Schrefler BA. A tumor growth model with deformable ECM.  
494 *Physical biology*. 2014a; 11(6).
- 495 **Sciumè G**, Shelton S, Gray WG, Miller CT, Hussain F, Ferrari M, Decuzzi P, Schrefler BA. A multiphase model for  
496 three-dimensional tumor growth. *New Journal of Physics*. 2013 jan; 15(1):015005. <https://doi.org/10.1088/1367-2630/15/1/015005>.
- 497
- 498 **Sciumè G**, Boso DP, Gray WG, Cobelli C, Schrefler BA. A two-phase model of plantar tissue: a step toward  
499 prediction of diabetic foot ulceration. *International Journal for Numerical Methods in Biomedical Engineering*.  
500 2014b; 30(11):1153–1169. <https://onlinelibrary.wiley.com/doi/abs/10.1002/cnm.2650>.
- 501 **Stein E**, de Borst R, Hughes TJR. *Encyclopedia of Computational Mechanics*, Vol. 1. Wiley; 2017.
- 502 **Verruijt A**, *Theory and Problems of Poroelasticity*; 2013. <https://geo.verruijt.net/>.

## 503 **Appendix A. The Multiphase System**

504 We give in this section all the details about governing equations and the constitutive relationships.  
505 According to the different phases, solid scaffold  $s$ , medium/interstitial fluid  $l$  and tumor cells phase  
506  $t$ , described in the main article, section Methods, which constitute the multiphase system, at each  
507 point in the domain, the following constraint must be respected

$$\epsilon^s + \epsilon^t + \epsilon^l = 1, \quad (4)$$

508 where  $\varepsilon^\alpha$  is the volume fraction of phase  $\alpha$ . Defining the porosity  $\varepsilon$  as

$$\varepsilon = 1 - \varepsilon^s, \quad (5)$$

509 Equation 4 can also be expressed in terms of the saturation degree of the fluid phase,  $S^f = \varepsilon^f / \varepsilon$   
510 (with  $f = t, l$ )

$$S^t + S^l = 1. \quad (6)$$

511

## 512 Mass conservation equations

513 We express the mass conservation equation for each phase. We use a material description for the  
514 motion of the solid phase and a spatial description for the fluid phases, whose reference space  
515 is that occupied by the solid scaffold. As the solid is deformable, this reference space is not fixed  
516 in time but evolves according to the displacement of the solid phase. For this reason we express  
517 mass conservation equations for each phase and species in their material form with respect to the  
518 solid scaffold velocity. Mass conservation equations of solid, cell and interstitial fluid phases read:

519

$$\frac{D^s}{Dt} (\rho^s \varepsilon^s) + \rho^s \varepsilon^s \nabla \cdot \mathbf{v}^s = 0, \quad (7)$$

520

$$\frac{D^s}{Dt} (\rho^t \varepsilon S^t) + \nabla \cdot (\rho^t \varepsilon S^t \mathbf{v}^{\bar{t}s}) + \rho^t \varepsilon S^t \nabla \cdot \mathbf{v}^s = \sum_{i \in I} \overset{il \rightarrow t}{M} \quad (8)$$

521

$$\frac{D^s}{Dt} (\rho^l \varepsilon S^l) + \nabla \cdot (\rho^l \varepsilon S^l \mathbf{v}^{\bar{l}s}) + \rho^l \varepsilon S^l \nabla \cdot \mathbf{v}^s = - \sum_{i \in I} \overset{il \rightarrow t}{M} \quad (9)$$

522 where  $\frac{D^s}{Dt}$  is the material time derivative with respect to the solid phase,  $\rho^\alpha$  is the density of phase  
523  $\alpha$ ,  $\mathbf{v}^s$  is the velocity vector of the solid phase,  $\sum_{i \in I} \overset{il \rightarrow t}{M}$  is the total mass exchange (water, oxygen and  
524 other nutrients) from the interstitial fluid to the tumor due to cell growth and metabolism,  $\mathbf{v}^{\bar{t}s}$  is  
525 the relative velocity of cells, and  $\mathbf{v}^{\bar{l}s}$  is relative velocity of the interstitial fluid.

526 The tumor cell phase is a mixture of living (LTC) and necrotic tumor cells (NTC), with mass fraction  
527  $\omega^{Lt}$  and  $\omega^{Nt}$ , respectively. The following constraint applies

$$\omega^{Lt} + \omega^{Nt} = 1. \quad (10)$$

528 Mass conservation equations for each fraction, assuming that there is no diffusion of both necrotic  
529 and living cells, read

$$\frac{D^s}{Dt} (\rho^t \omega^{Lt} \varepsilon S^t) + \nabla \cdot (\rho^t \omega^{Lt} \varepsilon S^t \mathbf{v}^{\bar{t}s}) + \rho^t \omega^{Lt} \varepsilon S^t \nabla \cdot \mathbf{v}^s = \sum_{i \in I} \overset{il \rightarrow t}{M} - \varepsilon^t r^{Nt}, \quad (11)$$

530

$$\frac{D^s}{Dt} (\rho^t \omega^{Nt} \varepsilon S^t) + \nabla \cdot (\rho^t \omega^{Nt} \varepsilon S^t \mathbf{v}^{\bar{t}s}) + \rho^t \omega^{Nt} \varepsilon S^t \nabla \cdot \mathbf{v}^s = \varepsilon^t r^{Nt}, \quad (12)$$

531 where  $\varepsilon^t r^{Nt}$  is the death rate of tumor cells. Note that only one of Eqs 11-12 is independent: actu-  
532 ally, one can be obtained subtracting the other from Eqn 8 and accounting for the constraint Eqn  
533 10.

534 Oxygen is the only nutrient which we consider explicitly. Another mass balance equation is intro-  
535 duced which governs the advection-diffusion of oxygen,  $n$ , within the interstitial fluid

$$\frac{D^s}{Dt} (\rho^l \omega^{\bar{n}l} \varepsilon S^l) + \nabla \cdot (\rho^l \omega^{\bar{n}l} \varepsilon S^l \mathbf{v}^{\bar{l}s}) + \nabla \cdot (\rho^l \omega^{\bar{n}l} \varepsilon S^l \mathbf{u}^{\bar{n}l}) + \rho^l \omega^{\bar{n}l} \varepsilon S^l \nabla \cdot \mathbf{v}^s = - \overset{nl \rightarrow t}{M} \quad (13)$$

536 where  $\mathbf{u}^{\bar{n}l}$  is the diffusive velocity of oxygen in the interstitial fluid and  $\overset{nl \rightarrow t}{M}$  the oxygen consumed  
537 by tumor cells due to their metabolism and proliferation rate.

### 538 **Momentum conservation equations**

539 We neglect here the effect of gravitational body forces as their contribution is negligible compared  
 540 to that of other forces. Furthermore, as we assume quasi-static processes and small difference in  
 541 density between cells and aqueous solutions, inertial forces and the force due to mass exchange  
 542 can also be neglected. These assumptions simplify the general form of the linear momentum  
 543 balance equation given in *Gray and Miller (2014)* which becomes

$$\nabla \cdot (\varepsilon^\alpha \mathbf{t}^\alpha) + \sum_{K \in \mathfrak{S}_{c\alpha}}^{K \rightarrow \alpha} \mathbf{T} = \mathbf{0} \quad (\alpha = s, t, l), \quad (14)$$

544 where  $\mathbf{t}^\alpha$  is the stress tensor of phase  $\alpha$ ,  $\mathfrak{S}_{c\alpha}$  is the set phases connected to  $\alpha$  and  $\mathbf{T}^{K \rightarrow \alpha}$  is the inter-  
 545 action force between phase  $\alpha$  and the adjacent phases. Summing eqn 14 over all phases gives the  
 546 momentum equation of the whole multiphase system as

$$\nabla \cdot \mathbf{t}^{\bar{T}} = \mathbf{0}, \quad (15)$$

547 where  $\mathbf{t}^{\bar{T}}$  is the total Cauchy stress tensor acting on the multiphase system.

548 Assuming that for relatively slow flow, the stress tensor for a fluid phase,  $f$ , can be properly approx-  
 549 imated as

$$\mathbf{t}^f = -p^f \mathbf{1} \quad (f = t, l) \quad (16)$$

550 where  $p^f$  is the averaged fluid pressure and  $\mathbf{1}$  the unit tensor, Eqn. 14 which apply for a generic  
 551 phase  $\alpha$  (solid or fluid) can be expressed in an alternative form for fluid phases as *Sciumè et al.*  
 552 *(2013)*

$$\varepsilon^f \nabla p^f + \mathbf{R}^f \cdot (\mathbf{v}^f - \mathbf{v}^s) = \mathbf{0} \quad (f = t, l) \quad (17)$$

553 where  $\mathbf{R}^f$  is a symmetric second order resistance tensor accounting for interaction between the  
 554 fluid phase and the solid phase,  $s$ . Eqn. 17 can be rewritten as

$$-\mathbf{K}^f \cdot \nabla p^f = \varepsilon^f (\mathbf{v}^f - \mathbf{v}^s) \quad (f = t, l), \quad (18)$$

555 where  $\mathbf{K}^f = (\varepsilon^f)^2 (\mathbf{R}^f)^{-1}$  is called the hydraulic conductivity. The hydraulic conductivity depends on  
 556 the dynamic viscosity of the flowing fluid,  $\mu^f$ , on the intrinsic permeability of the porous scaffold,  
 557  $k$ , and on the fluid saturation degree,  $S^f$ , via a relative permeability function  $k_{rel}^f(S^f) = (S^f)^A$  ( $A$   
 558 depending on the fluid characteristics, see *Sciumè et al. (2014c)*). As customary in biphasic flow  
 559 problems we set here  $\mathbf{K}^f = k \frac{k_{rel}^f(S^f)}{\mu^f} \mathbf{1}$ . Hence, the governing linear momentum conservation equa-  
 560 tions for tumor cells and interstitial fluid read

$$-k \frac{k_{rel}^t(S^t)}{\mu^t} \nabla p^t = \varepsilon^t (\mathbf{v}^t - \mathbf{v}^s), \quad (19)$$

561

$$-k \frac{k_{rel}^l(S^l)}{\mu^l} \nabla p^l = \varepsilon^l (\mathbf{v}^l - \mathbf{v}^s), \quad (20)$$

562

### 563 **Effective stress principle and closure relationships**

564 We assume here that fluid phases are incompressible and the solid phase is almost incompressible.  
 565 However, the overall multiphase system is not incompressible, because of the presence of porosity  
 566 that evolves according with the scaffold deformation. As phases are incompressible, their densities  
 567  $\rho^\alpha$  with  $\alpha = s, t, l$  are constant. As the solid phase is quasi incompressible, the Biot's coefficient is  
 568 set to unity. With these premises, the total Cauchy stress tensor appearing in eqn 15 is related to  
 569 the Biot's effective stress as follows

$$\mathbf{t}^{\bar{E}} = \mathbf{t}^{\bar{T}} + p^s \mathbf{1}, \quad (21)$$

570 where  $p^s = S^t p^t + S^l p^l$  is the so-called solid pressure, describing the interaction between the two  
 571 fluids and the solid scaffold.

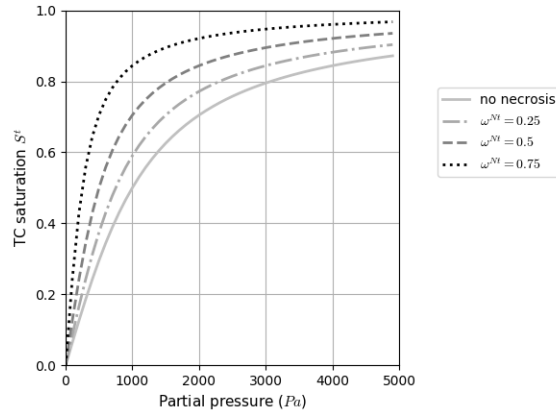

**Appendix 0 Figure 7.** Tumor cell phase saturation  $S^t$ , with the parameter  $a$  fixed to 1kPa, evolving with the necrotic fraction of the phase  $\omega^{Nt}$

572 The chosen closure relationship for the effective stress  $\mathbf{t}^{\bar{E}}$  is linear elastic:

$$\mathbf{t}^{\bar{E}} = \bar{\bar{\bar{C}}} : \epsilon(\mathbf{u}^{\bar{s}}), \quad (22)$$

573 with  $\epsilon(u^s) = \frac{1}{2}(\nabla \mathbf{u}^{\bar{s}} + (\nabla \mathbf{u}^{\bar{s}})^T)$  and  $\bar{\bar{\bar{C}}}(\lambda, \mu)$  the fourth order elasticity tensor,

574 reduced in Voigt notation:

$$\begin{pmatrix} \lambda + 2\mu & \lambda & \lambda & 0 & 0 & 0 \\ \lambda & \lambda + 2\mu & \lambda & 0 & 0 & 0 \\ \lambda & \lambda & \lambda + 2\mu & 0 & 0 & 0 \\ 0 & 0 & 0 & \mu & 0 & 0 \\ 0 & 0 & 0 & 0 & \mu & 0 \\ 0 & 0 & 0 & 0 & 0 & \mu \end{pmatrix}$$

575 with the Lamé constant  $\lambda = \frac{Ev}{(1+\nu)(1-2\nu)}$  and  $\mu = \frac{E}{2(1+\nu)}$ .

576  $E$  the Young modulus of the solid scaffold and  $\nu$  its Poisson ratio.

577 The experimental measurement of cells density inside the capsule revealed a strong dependency  
 578 to necrotic fraction  $\omega^{Nt}$ . Hence, the pressure-saturation closure relationship has been improved  
 579 with respect to that proposed in *Sciumè et al. (2014a)*, to be more physically relevant and adapted  
 580 to confinement situation

$$S^t = \frac{2}{\pi} \arctan \left( \frac{p^{tl}}{(1 - \omega^{Nt})a} \right), \quad (23)$$

581 with  $p^{tl}$  pressure difference between tumor and interstitial fluid (i.e.  $p^{tl} = p^t - p^l$ ). The saturation is  
 582 directly linked to the partial pressure of the phase and a constant parameter  $a$ , which accounts for  
 583 the effect of cell surface tension and of the refinement of the porous network (see *Sciumè et al.*  
 584 *(2014d)* for the biophysical justification of the proposed equation). Its influence is offset by the  
 585 necrotic fraction of tumor cells,  $\omega^{Nt}$  (see Fig. *Figure 7*), which allows us to model necrotic areas of  
 586 very high cell density according with experimental evidence.

587

### 588 Tumor cells growth, metabolism and necrosis

589 The tumor cells growth, metabolism and necrosis are regulated by a variety of nutrient species and  
 590 intracellular signalling. However, without losing generality, in the present model one single nutrient  
 591 is considered: oxygen. The case of multiple species can be easily obtained as a straightforward  
 592 extension of the current formulation. The Fick's law, adapted to porous medium, was adopted to  
 593 model diffusive flow of oxygen eq.13:

$$\omega^{nl} \mathbf{u}^{nl} = -D^{nl} \nabla \omega^{nl} \quad (24)$$



594 where  $D^{nl}$  the diffusion coefficient for oxygen in the interstitial fluid is defined by the constitutive  
 595 equation from *Sciumè et al. (2014c)*

$$D^{nl} = D_0^{nl} (\varepsilon S^l)^\delta, \quad (25)$$

596 the exponent  $\delta$  sets to 2 (see *Sciumè et al. (2014a)*, *Mascheroni et al. (2016)*, *Santagiuliana et al.*  
 597 *(2019)*).

598 Tumor cell growth is related to the exchange of nutrients between the IF and the living fraction of  
 599 the tumor. The total mass exchange from IF to the tumor cell phase is defined as

$$\sum_{i \in I} M^{i \rightarrow t} = \gamma_g^t \mathcal{H}(\omega^{\bar{n}l}) (1 - \mathcal{H}_p(p^t)) (1 - \omega^{\bar{N}t}) \varepsilon S^t, \quad (26)$$

600 Note that  $(1 - \omega^{\bar{N}t}) \varepsilon S^t$  is the living fraction of the tumor.  $\gamma_g^t$  is the tumor growth rate parameter,  
 601 cell-line dependent.  $\mathcal{H}$  and  $\mathcal{H}_p$  are regularized step functions varying between 0 and 1, with two  
 602 threshold parameters  $\sigma_1, \sigma_2$ , that is to say  $\mathcal{H} = \mathcal{H}(\sigma, \sigma_1, \sigma_2)$ . When the variable  $\sigma$  is greater than  $\sigma_2$ ,  
 603  $\mathcal{H}$  is equal to 1, it decreases progressively when the variable is between  $\sigma_1$  and  $\sigma_2$  and is equal to  
 604 zero when the variable is lower than  $\sigma_1$ .  $\mathcal{H}$  represent the growth dependency to oxygen:

$$\mathcal{H}(\omega^{\bar{n}l}, \omega_{\text{crit}}, \omega_{\text{env}}) = \begin{cases} 0 & \text{if } \omega^{\bar{n}l} \leq \omega_{\text{crit}} \\ \frac{1}{2} - \frac{1}{2} \cos \pi \frac{\omega^{\bar{n}l} - \omega_{\text{crit}}}{\omega_{\text{env}} - \omega_{\text{crit}}} & \text{if } \omega_{\text{crit}} \leq \omega^{\bar{n}l} \leq \omega_{\text{env}} \\ 1 & \text{if } \omega^{\bar{n}l} \geq \omega_{\text{env}} \end{cases} \quad (27)$$

605  $\omega_{\text{env}}$ , the optimal oxygen mass fraction, is set to  $4, 2 \cdot 10^{-6}$  which corresponds, according to Henry's  
 606 law, to 90mmHg, the usual oxygen mass fraction in arteries (see *Ortiz-Prado et al. (2019)*).  $\omega_{\text{crit}}$ , the  
 607 hypoxia threshold, is cell-line dependent, for tumor cells, it has been set to a very low value:  $10^{-6}$   
 608 ( $\approx 20$ mmHg, for common human tissue cells, hypoxic level is defined between 10 and 20mmHg  
 609 *Khan et al. (2007)*) The function  $\mathcal{H}(\omega^{\bar{n}l}, \omega_{\text{crit}}, \omega_{\text{env}})$  is plotted **Figure 8A**.

610 Function  $(1 - \mathcal{H}_p)$  represents the dependency on pressure:

$$\mathcal{H}_p(p^t, p_1, p_{\text{crit}}) = \begin{cases} 0 & \text{if } p^t \leq p_1 \\ \sqrt{\frac{p^t - p_1}{p_{\text{crit}} - p_1}} & \text{if } p_1 \leq p^t \leq p_{\text{crit}} \\ 1 & \text{if } p^t \geq p_{\text{crit}} \end{cases} \quad (28)$$

611 An example of the function  $\mathcal{H}_p(p^t, p_1, p_{\text{crit}})$  is plotted **Figure 8B**, we have set  $p_{\text{crit}}$  to 6kPa as initial  
 612 guess (in *Helmlinger et al. (1997)*, they found a inhibitory pressure at 10kPa) and  $p_1$ , the pressure  
 613 threshold when the inhibitory process starts, at 2kPa.

614 As tumor grows, nutrients are taken up from the IF so that the sink term in eq.13 takes the following  
 615 form:

$$M^{nl \rightarrow t} = \left[ \gamma_g^{nl} \mathcal{H}(\omega^{\bar{n}l}) (1 - \mathcal{H}_p(p^t)) + \gamma_0^{nl} \tilde{\mathcal{H}} \right] (1 - \omega^{\bar{N}t}) \varepsilon S^t, \quad (29)$$

616 Nutrient consumption from IF is due to two contributions: the growth of the tumor cells, as given by  
 617 the first term within the square brackets in eq.29, the metabolism of the healthy cells, as presented  
 618 in the second term. Thus,  $\gamma_g^{nl}$  is related to the cell proliferation, as discussed above; whereas the  
 619 coefficient  $\gamma_0^{nl}$  relates to the cell metabolism.  $\tilde{\mathcal{H}}$  is an adaptation of the previous step functions for  
 620 the cell metabolism:

$$\tilde{\mathcal{H}}(\omega^{\bar{n}l}) = \begin{cases} 1 & \text{if } \omega^{\bar{n}l} \geq \omega_{\text{crit}} \\ \frac{1}{2} - \frac{1}{2} \cos \pi \frac{\omega^{\bar{n}l}}{\omega_{\text{crit}}} & \text{else} \end{cases} \quad (30)$$

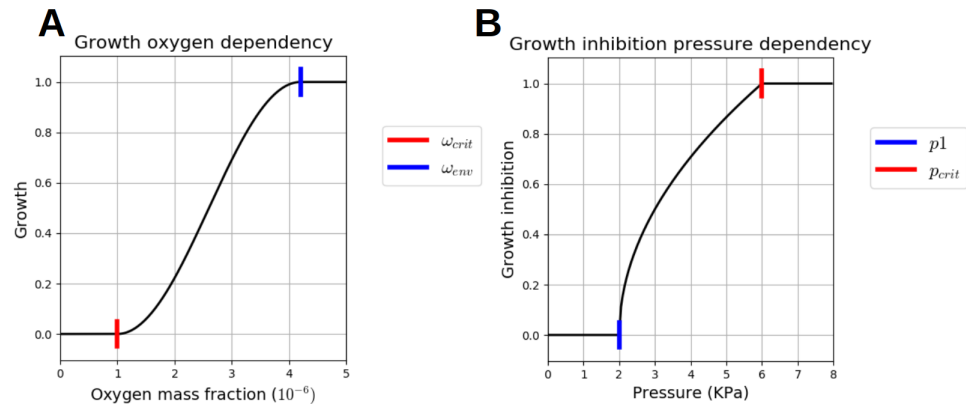

**Appendix 0 Figure 8.** Two mechano-biological laws. **A**  $H(\omega^{\tilde{n}}, \omega_{env}, \omega_{crit})$ . The TC growth and nutrient consumption are dependent to the oxygen mass fraction  $\omega^{\tilde{n}}$ . If it is lower than  $\omega_{crit}$ , the TC growth is stopped and the nutrient consumption is reduced to the metabolism needs only. If it is greater or equal to  $\omega_{env}$ , the growth and the nutrient consumption are maximum. **B**  $H_p(p^t, p_{crit}, p_1)$ . The TC growth and nutrient consumption are dependent to the TC pressure. If it is greater than  $p_1$ , the 2 processes begin to be strongly affected and if the TC pressure reaches  $p_{crit}$ , they are totally stopped.

621 The model does not discriminate between proliferating and quiescent cells, but the growth is sub-  
 622 ject to  $H(\omega^{\tilde{n}}, \omega_{crit}, \omega_{env})$ . To make possible the comparison with the experimental proliferative cell  
 623 quantities (see **Figure 6**), the following relationship has been set:

624

$$\omega_{grow}^{TC} = \begin{cases} 0 & \text{if } \omega^{\tilde{n}} \leq \omega_{crit} \\ S^t \frac{\omega^{\tilde{n}}}{\omega_{env}} & \text{else} \end{cases} \quad (31)$$

625  $\tilde{H}$  is also used in the definition of hypoxic necrosis rate which reads

$$\varepsilon S^t r^{Ni} = \gamma^{Ni} (1 - \tilde{H}(\omega^{\tilde{n}})) (1 - \omega^{Ni}) \varepsilon S^t, \quad (32)$$

626 where  $\gamma^{Ni} = 0.01$  is the necrotic growth rate. As the experimental data on necrosis were too sparse  
 627 for this parameter identification (only a few stained cells imaging), we have kept its generic value.

## 628 **Appendix B. Computational framework**

629 The model has been coded in Python and C++ in the open-source FEniCS framework *Alnæs et al.*  
 630 (2015) with an incremental monolithic resolution of the mixed finite element (FE) formulation. The  
 631 monolithic resolution allows us to reduce substantially the computational time compared with  
 632 staggered resolution methods usually adopted (e.g. see *Sciumè et al. (2014b)*). Whereas spherical  
 633 symmetry is assumed in experimental results, we have chosen cylindrical symmetry to preserve  
 634 the generality and the adaptability of the FE mesh and formulation. Even if the computational time  
 635 is more important, it remains reasonable: 3 hours in a single core of an average laptop; 1D spher-  
 636 ical formulation would have forced us to quit classical FE formulation or to design, for each case, a  
 637 specific finite difference formulation.

638 The simulations have been run with composite Taylor-Hood element  $P_3(\mathbb{R}^2)$ ,  $[P_2(\mathbb{R})]^3$  (one vecto-  
 639 rial and three scalar unknowns), a mesh cell size of  $dh = 5\mu\text{m}$  and an implicit Euler scheme with  
 640  $dt = 1200\text{s}$ . An updated lagrangian approach has been adopted to account for geometrical nonlin-  
 641 earities, the incremental resolution allows us to update primary variables as follows:

$$\mathbf{X}_{n+1} = \mathbf{X}_n + \delta\mathbf{X} \quad (33)$$

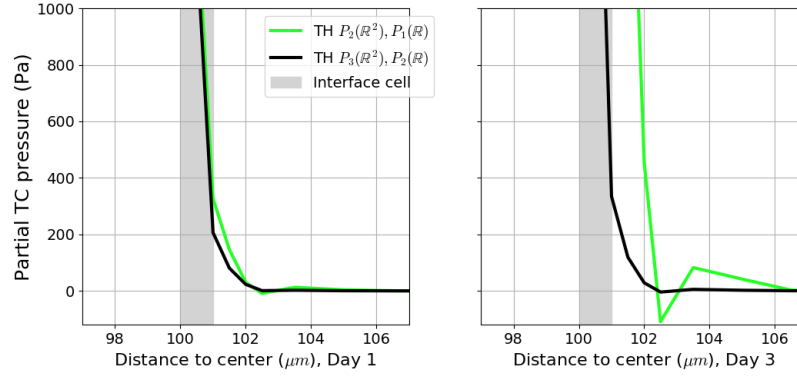

**Appendix 0 Figure 9.** Choice of the element (composite Taylor-Hood  $P_2(\mathbb{R}^2), [P_1(\mathbb{R})]^3$ , green ; composite Taylor-Hood  $P_3(\mathbb{R}^2), [P_2(\mathbb{R})]^3$ , brown). The linear approximation  $P_1(\mathbb{R})$  of the partial tumor cells pressure at the capsule interface (Interface element shared, black) is poor (Left, Day 1) and provoke numerical infiltration of tumor cells into the alginate capsule (Right, Day 3)

with  $\delta\mathbf{X}$  the vector of unknowns

$$\delta\mathbf{X} = \begin{pmatrix} \delta u_r^s \\ \delta u_z^s \\ \delta p^l \\ \delta p^{il} \\ \delta \omega^{nl} \end{pmatrix}$$

After each time step, the space  $\mathcal{X}^s \in \mathbb{R}^2$  is updated:

$$\mathcal{X}_{n+1}^s = \mathcal{X}_n^s + \delta\mathbf{u}^s$$

642 All the codes used in this article, analytical verification, free growth and confined growth, are avail-  
643 able on Github, at [https://github.com/StephaneUrcun/MCTS\\_mechanics](https://github.com/StephaneUrcun/MCTS_mechanics)

#### 644 **Choice of the element**

645 For all mixed FE problem with vectorial and scalar coupled unknowns, the chosen finite element  
646 should verify the inf-sup condition, that is to say, should preserve the coercivity of the bilinear form  
647 (see *Boffi et al. (2013)* p.223-230). A simple choice is the Taylor-Hood element, with a Lagrange el-  
648 ement of order  $k \geq 1$  for the scalar unknowns and order  $k + 1$  for the vectorial one. However,  
649 modelling an encapsulated tumor growth implies a very sharp gradient at the capsule inner radius  
650 for the partial pressure of the tumor cells phase  $p^{il}$ . The linear approximation of the Lagrange  
651 element of order 1 could not describe it, except at the cost of an extremely refined mesh at the  
652 interface, and the error could provoke *numerical infiltration* of tumor cells in the alginate capsule  
653 (see Fig. *Figure 9*). To avoid this phenomenon, the composite Taylor-Hood element has been set to  
654 a higher order, precisely the mixed FE formulation in FEniCS uses the composite Taylor-Hood ele-  
655 ment  $P_3(\mathbb{R}^2), [P_2(\mathbb{R})]^3$ . The demonstration of Lax-Milgram theorem for this type of mixed problem  
656 could be found in the *Encyclopedia of Computational Mechanics*, Vol.1, p.149-202 *Stein et al. (2017)*.

#### 657 **Choice of the mesh cell size**

658 The mixed FE problem has been computed on 5 different meshes, with uniform cell sizes  $dh =$   
659  $50, 20, 10, 5$  and  $2.5 \mu\text{m}$ . To measure the FE solution degradation the primary variable  $\omega^{nl}$ , the oxy-  
660 gen mass fraction, has been monitored at the spheroid center during 4 days (see Fig *Figure 10* ).  
661 The thinner mesh of cell size  $dh = 2.5 \mu\text{m}$  has been used as reference for the RMSE. Despite an  
662 important increase of the computation time, the mesh cell size of  $dh = 5 \mu\text{m}$  has been chosen to  
663 restrict the relative degradation of the FE solution to  $RMSE = 0.01$  (see Table 2).

**Appendix 0 Table 2.** Relative degradation of the solution due to mesh cell size. Measured by root mean square, the reference being the thinner mesh with a mesh cell size of  $dh = 2.5 \mu\text{m}$ .

|                                     | $dh = 50 \mu\text{m}$ | $dh = 20 \mu\text{m}$ | $dh = 10 \mu\text{m}$ | $dh = 5 \mu\text{m}$ |
|-------------------------------------|-----------------------|-----------------------|-----------------------|----------------------|
| $RMSE(dh, 2.5 \mu\text{m}, 400/dh)$ | 0.182                 | 0.032                 | 0.019                 | 0.010                |

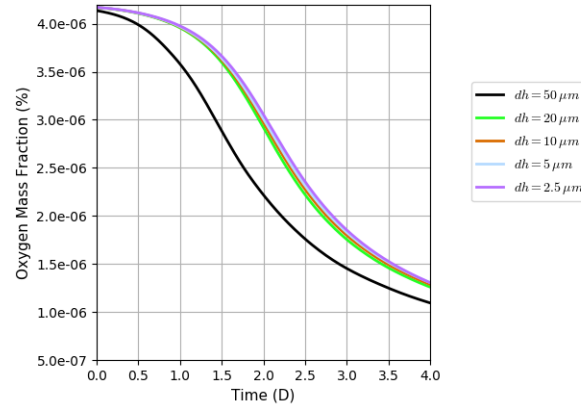

**Appendix 0 Figure 10.** Sensibility of the solution related to mesh refinement. The oxygen mass fraction,  $\omega^{nl}$ , at the center of the spheroid has been monitored during six days for five different mesh cell sizes. ( $dh = 50 \mu\text{m}$ , black ;  $dh = 20 \mu\text{m}$ , green ;  $dh = 10 \mu\text{m}$ , brown;  $dh = 5 \mu\text{m}$ , light blue ;  $dh = 2.5 \mu\text{m}$ , purple)

### 664 Verification of the FE formulation with an analytical solution

665 If this system is considered with a single phase flow into a porous medium under a constant load  
 666 with the right boundary conditions, one obtains the problem as known as Terzaghi's consolidation,  
 667 which has an analytical solution **Verruijt (2013)**. The system, under a constant load  $\mathbf{T}$ , is reduced  
 668 to two primary variables the displacement of the solid scaffold  $\mathbf{u}^s$  and the pressure of the single  
 669 phase fluid  $p^l$ :

$$\begin{cases} \nabla \cdot \mathbf{v}^s - \nabla \cdot \left[ \frac{k}{\mu} \nabla p^l \right] = 0 \text{ on } \Omega \\ \nabla \cdot \bar{\mathbf{t}}_t = 0 \text{ on } \Omega \\ \nabla \cdot \bar{\mathbf{t}}_t = -\mathbf{T} \text{ on } \Gamma_s \end{cases} \quad (34)$$

with  $\mathbf{T} = \begin{pmatrix} 0 \\ p_0 \end{pmatrix}$

670  
 671  
 672 The fluid is free to escape only at the loaded boundary, this boundary condition is known as drying  
 673 condition. The analytical solution of this problem is:

$$p^l(y, t) = p_0 \frac{4}{\pi} \sum_{k=1}^{\infty} \frac{(-1)^{k-1}}{2k-1} \cos\left((2k-1) \frac{\pi y}{2L}\right) \exp\left((2k-1)^2 \frac{\pi^2}{4} \bar{t}\right) \quad (35)$$

With the characteristic time of the consolidation  $\bar{t}$ , equal to  $\frac{c_v t}{L^2}$ ,  $L$  sets to  $100 \mu\text{m}$  and  $c_v$ , the consolidation coefficient:

$$c_v = \frac{k}{\mu^l} (\lambda + 2\mu)$$

674 where  $\lambda$  and  $\mu$  are Lamé constants of the solid scaffold,  $k$  is its intrinsic permeability and  $\mu^l$  the fluid  
 675 dynamic viscosity. The addition of the RMSE of the 4 samples at  $\bar{t} = 0.01, 0.1, 0.5, 1$  (see Fig. **Figure 11**)  
 676 with the analytical solution as reference gives  $\sum RMSE = 0.0028$ . The surface error for different  
 677 cell sizes  $dh$  and time steps  $dt$  is in Fig. **Figure 11**(right).

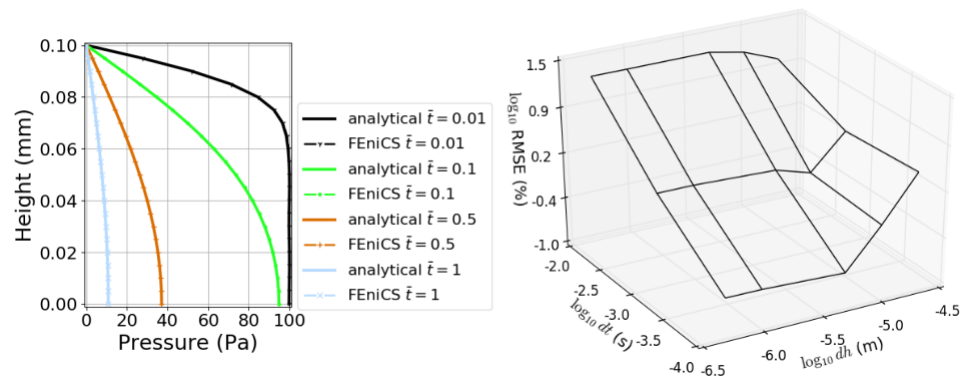

**Appendix 0 Figure 11.** Left: qualitative comparison between analytical solution of Terzaghi's problem and FEniCS computation. (4 comparisons at characteristic time of consolidation  $\bar{t} = 0.01, 0.1, 0.5, 1$ ). Right: quantitative comparison: error surface between Terzaghi's analytical solution and FEniCS computation. (x axis:  $\log_{10}$  of cell size  $dh$ ; y axis:  $\log_{10}$  of  $dt$ ; z axis:  $\log_{10}$  of RMSE). The minimum RMSE= 0.0028 is reached at  $dh = 5\mu\text{m}$ ,  $dt = 1e^{-4}$

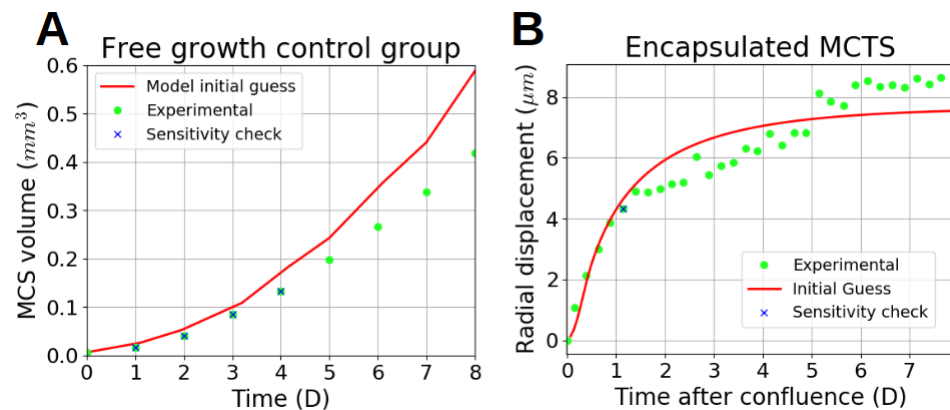

**Appendix 0 Figure 12.** Results with the 7 parameters at their initial values:  $\gamma_g^t = 4 \cdot 10^{-2}$ ,  $\gamma_0^{nl} = 6 \cdot 10^{-4}$ ,  $a = 800$ ,  $p_1 = 1800$ ,  $p_{\text{crit}} = 4000$  (see Table 1). Experimental, green dot; Model, red; Sensitivity evaluation, blue x. Left: free growth; Right: encapsulated growth

## 678 Appendix C. Sensitivity analysis

679 For the sensitivity analysis, the experimental input data were:

- 680 • for the free MCTS, the volume monitored over a time span from day 1 to day 4. These data
- 681 are denoted  $Y_{\text{free}}^{\text{exp}}$
- 682 • for the encapsulated MCTS the capsule strain one day after confluence and the correspond-
- 683 ing analytical pressure (i.e. incompressible elastic membrane). We chose the capsule of inner
- 684 radius =  $100\mu\text{m}$  and thickness =  $34\mu\text{m}$ , presented as the reference case in **Alessandri et al.**
- 685 **(2013)**. These data are denoted  $Y_{\text{conf}}^{\text{exp}}$ .

686 We performed a variance-based sensitivity study of the FE solution on the parameters, both on the

687 free and encapsulated MCTS, as follows:

- 688 • A first order analysis, the 7 parameters are disturbed one at a time respectively to a 8 points
- 689 grid.
- 690 • Interaction analysis, the 21 parameters tuples are evaluated at the 2 extreme points of the
- 691 grid.

692 All the results were interpreted with a polynomial model in order to quantify their weights in the

693 FE solution variance, referred to as Sobol indices.

## 694 Cost functions

In order to build a the cost function for the multiphase system with the sparse data available, a simulation noted  $Y_{\text{goal}}$  has been run freely until it reaches the experimental volume corresponding to  $Y_{\text{free}}^{\text{exp}}$ , the experimental data of days 1,2,3 and 4. At the corresponding iterations, the numerical quantities have been stored. At day  $i$ , the tumor volume is equal to:

$$V_{\text{goal}_i} = \int_{\Omega} \varepsilon_i S_i^t dx$$

695 where  $\Omega$  is the whole computation domain, as  $S^t = 0$  outside of the tumor zone.

696 A second simulation with the same parameters has been run for 4 days and its volume has been  
697 compared to  $Y_{\text{goal}}$  at the time steps corresponding to 1, 2, 3 and 4 days, noted  $D_i$  ( $i = 1, 2, 3, 4$ ). One  
698 can write this cost function explicitly:

$$J_{\text{free}}(X, \Phi) = \sum_{i=1}^4 \int_{\Omega} [\varepsilon(D_i) S^t(D_i) - \varepsilon_i S_i^t]^2 dx \quad (36)$$

For the encapsulated configuration, the cost function  $J_{\text{conf}}(X, \Phi)|_T$  has the classical form:

$$J_{\text{conf}}(X, \Phi)|_{T_i} = \int_{\partial_{\text{Caps}}} \langle F(X, \Phi, T) - Y_{\text{conf}}^{\text{exp}}(T) \rangle ds$$

699 Where the observable  $Y_{\text{conf}}^{\text{exp}}$  has two components,  $u(R_{\text{in}})$  the experimental measurement of the cap-  
700 sule inner radius at time  $T_i$  after confluence ( $\partial_{\text{Caps}}$  corresponding to the interface between the  
701 MCTS and the alginate capsule), and  $P_{\text{conf}}$  the analytical pressure on capsule given in **Alessandri**  
702 **et al. (2013)**, calculated using the formalism of thick-walled internally pressurized spherical vessels  
703 as follows: assuming that the alginate gel is isotropic and incompressible the radial displacement  
704 of the inner wall,  $u(R_{\text{in}})$ , reads

$$u(R_{\text{in}}) = \frac{3}{4} \frac{P_{\text{conf}}}{E} \frac{R_{\text{in}}}{1 - (R_{\text{in}}/R_{\text{out}})^3}. \quad (37)$$

705 where  $P_{\text{conf}}$  is the internal pressure,  $E$  is the Young's modulus, and  $R_{\text{in}}$  and  $R_{\text{out}}$  are the inner and  
706 outer radii of the capsule, respectively. Alginate incompressibility also implies volume conservation  
707 of the shell. This gives the following constraint equation

$$R_{\text{out}}^3(t) - R_{\text{in}}^3(t) = R_{\text{out}}^3(0) - R_{\text{in}}^3(0) = \delta(R_0^3) \quad (38)$$

708 Using this equation, the two time variables  $R_{\text{in}}(t)$  and  $R_{\text{out}}(t)$  can be separated and pressure,  $P_{\text{conf}}(t)$ ,  
709 written as a function of  $R_{\text{in}}(t)$  only

$$P_{\text{conf}}(t) = \frac{4}{3} E \left[ 1 - \frac{1}{1 + \delta(R_0^3)/R_{\text{in}}^3(t)} \right] \frac{u(R_{\text{in}}(t))}{R_{\text{in}}(t)} \quad (39)$$

710 The numerical approximation  $F(X, \Phi, T)$  has the two corresponding components ( $\mathbf{u}^s, p^s$ ) in  $\partial_{\text{Capsule}}$ .  
711 We compared the FE solution with the experimental data 1 day after confluence. One can write  
712 this cost function explicitly<sup>2</sup>:

$$J_{\text{conf}}(X, \Phi)|_{\text{day 1}} = \int_{\partial_{\text{Caps}}} \langle \mathbf{u}(R_{\text{in}}) - \mathbf{u}^s \rangle ds + \int_{\partial_{\text{Caps}}} (P_{\text{conf}} - p^s)^2 ds \quad (40)$$

713 Two simulations were run with the 7 parameters at their generic value (see **Figure 12**). We denoted  
714 the respective cost functions  $J0_{\text{free}}$  and  $J0_{\text{conf}}$ .

<sup>2</sup>For the cost function evaluation,  $u(R_{\text{in}})$  a scalar experimental quantity, has been converted in vectorial quantity  $\mathbf{u}(R_{\text{in}})$  with a constant norm on  $\partial_{\text{Caps}}$  equal to  $u(R_{\text{in}})$



**Appendix 0 Table 3.** Sobol indices of the first order sensitivity analysis of the free growth configuration

| Parameter       | $\theta$ | $S_i(\%)$ |
|-----------------|----------|-----------|
| $a$             | 0.2554   | 6.25      |
| $\mu_t$         | -0.1998  | 3.82      |
| $\gamma_g^t$    | 0.9205   | 81.17     |
| $\gamma_g^{nl}$ | -0.1161  | 1.29      |
| $\gamma_0^{nl}$ | -0.2790  | 7.45      |
| $p_1$           | 0        | 0         |
| $p_{crit}$      | 0        | 0         |

**Appendix 0 Table 4.** Sobol indices of the first order sensitivity analysis of the encapsulated growth configuration

| Parameter       | $\theta$ | $S_i(\%)$ |
|-----------------|----------|-----------|
| $a$             | 0,0550   | 13.43     |
| $\mu_t$         | -0,0006  | 0.001     |
| $\gamma_g^t$    | 0,0371   | 6.11      |
| $\gamma_g^{nl}$ | -0,0056  | 0.14      |
| $\gamma_0^{nl}$ | -0,0271  | 3.27      |
| $p_1$           | 0,0279   | 3.45      |
| $p_{crit}$      | 0,1288   | 73.57     |

### 715 First order analysis

716 Each parameter is disturbed one at a time respectively to this grid  $[-10, -5, -2, -1, +1, +2, +5, +10]\%$ ,  
 717 giving the corresponding  $\tilde{J}_{free}$  and  $\tilde{J}_{conf}$ . The relative variations of the cost functions were calculated  
 718 as follows:

$$\text{Var}_{free} = \frac{\tilde{J}_{free} - J0_{free}}{J0_{free}} \quad \text{and} \quad \text{Var}_{conf} = \frac{\tilde{J}_{conf} - J0_{conf}}{J0_{conf}} \quad (41)$$

719 In order to quantify the impact of each parameter, the following linear model was set:

$$\text{Var} = 1 + \sum_i \theta_i \alpha_i \quad (42)$$

720 where  $\alpha_i$  is an auxiliary parameter  $\in [-1, +1]$  representing the perturbations of the  $i^{th}$  parameter  
 721 along the grid and  $\theta_i$  the slope of the variation.

722 In a first order analysis, the influence of the  $i^{th}$  parameter is given by the Sobol indices:

$$S_i = \frac{\theta_i^2}{\sum_i \theta_i^2} \quad (43)$$

723 The results for the free and encapsulated configurations are reported in Tables 3 and 4.

### 724 Interaction analysis

725 As the independence of physical phenomenons involved in both configuration is one our major  
 726 modeling assessment, the interaction between parameters has also been studied. The 21 tuples  
 727 have been evaluated at the 2 extreme values of the grid for each configuration. The corresponding  
 728 polynomial model becomes:

$$\text{Var} = 1 + \sum_i \theta_i \alpha_i + \sum_{ij, i>j} \theta_{ij} \alpha_i \alpha_j \quad (44)$$

729 with the respective Sobol indices:

$$S_i = \frac{\theta_i^2}{\sum_i \theta_i^2 + \sum_{ij, i>j} \theta_{ij}^2} \quad \text{and} \quad S_{ij} = \frac{\theta_{ij}^2}{\sum_i \theta_i^2 + \sum_{ij, i>j} \theta_{ij}^2} \quad (45)$$

**Appendix 0 Table 5.** Sobol indices of the interaction sensitivity analysis of the free growth configuration

| Parameter                        | $S_i(\%)$    |
|----------------------------------|--------------|
| $a$                              | 5.11         |
| $\mu_t$                          | 3.13         |
| $\gamma_g^t$                     | 66.42        |
| $\gamma_g^{nl}$                  | 1.05         |
| $\gamma_0^{nl}$                  | 6.10         |
| $p_1$                            | 0            |
| $p_{crit}$                       | 0            |
| Parameter tuples                 | $S_{ij}(\%)$ |
| $(a, \mu_t)$                     | 0.06         |
| $(a, \gamma_g^t)$                | 14.52        |
| $(a, \gamma_g^{nl})$             | 0.02         |
| $(a, \gamma_0^{nl})$             | $1.10^{-4}$  |
| $(\mu_t, \gamma_g^t)$            | 1.32         |
| $(\mu_t, \gamma_g^{nl})$         | 0.06         |
| $(\mu_t, \gamma_0^{nl})$         | 0.38         |
| $(\gamma_g^t, \gamma_g^{nl})$    | 1.20         |
| $(\gamma_g^t, \gamma_0^{nl})$    | 0.21         |
| $(\gamma_g^{nl}, \gamma_0^{nl})$ | 0.37         |

730

The results for the free and encapsulated configurations are reported in Tables 5 and 6.

**Appendix 0 Table 6.** Sobol indices of the interaction sensitivity analysis of the encapsulated growth configuration

| Parameter                        | $S_i(\%)$    |
|----------------------------------|--------------|
| $a$                              | 12.96        |
| $\mu_t$                          | 0.001        |
| $\gamma_g^t$                     | 5.89         |
| $\gamma_g^{nl}$                  | 0.13         |
| $\gamma_0^{nl}$                  | 3.15         |
| $p_1$                            | 3.33         |
| $p_{crit}$                       | 70.94        |
| Parameter tuples                 | $S_{ij}(\%)$ |
| $(a, \mu_t)$                     | 0.01         |
| $(a, \gamma_g^t)$                | 0.003        |
| $(a, \gamma_g^{nl})$             | 0.01         |
| $(a, \gamma_0^{nl})$             | 0.02         |
| $(a, p_1)$                       | 0.009        |
| $(a, p_{crit})$                  | 0.02         |
| $(\mu_t, \gamma_g^t)$            | 0.02         |
| $(\mu_t, \gamma_g^{nl})$         | $5.10^{-6}$  |
| $(\mu_t, \gamma_0^{nl})$         | 0.007        |
| $(\mu_t, p_1)$                   | 0.003        |
| $(\mu_t, p_{crit})$              | 0.7          |
| $(\gamma_g^t, \gamma_g^{nl})$    | 0.02         |
| $(\gamma_g^t, \gamma_0^{nl})$    | 0.01         |
| $(\gamma_g^t, p_1)$              | $5.10^{-4}$  |
| $(\gamma_g^t, p_{crit})$         | 0.08         |
| $(\gamma_g^{nl}, \gamma_0^{nl})$ | 0.01         |
| $(\gamma_g^{nl}, p_1)$           | 0.002        |
| $(\gamma_g^{nl}, p_{crit})$      | 0.87         |
| $(\gamma_0^{nl}, p_1)$           | 0.01         |
| $(\gamma_0^{nl}, p_{crit})$      | 1.30         |
| $(p_1, p_{crit})$                | 0.42         |
